# Supplementary material for: Cellular and circuit features distinguish mouse dentate gyrus semilunar granule cells and granule cells activated during contextual memory formation
Source: eLife. 2025 Aug 27;13:RP101428. doi: 10.7554/eLife.101428 (PMC12387755; doi:10.7554/eLife.101428)
Supplement: Figure 1—figure supplement 1—source data 1. [file elife-101428-fig1-figsupp1-data1.xlsx]

## Sheet: A
Primary Latency (s)	Day 1	Day 2	Day 3	Day 4	Day 5	Day 6
mouse 1 trial 1	107	38	27	15	12	31
mouse 2 trial 1	68	22	16	15	12	12
mouse 3 trial 1	51	23	13	11	18	12
mouse 4 trial 1	28	26	11	12	14	24
mouse 1 trial 2	60	14	13	13	14	21
mouse 2 trial 2	185	72	13	52	33	20
mouse 3 trial 2	185	150	12	23	15	58
mouse 4 trial 2	107	64	12	17	38	65
mouse 1 trial 3	60	99	13	7	59	8
mouse 2 trial 3	185	58	75	25	11	19
mouse 3 trial 3	105	94	42	33	15	36
mouse 4 trial 3	115	61	50	13	9	50

## Sheet: B
Number of errors	Day 1	Day 2	Day 3	Day 4	Day 5	Day 6
mouse 1 trial 1	42	19	12	0	0	11
mouse 2 trial 1	23	0	0	0	2	1
mouse 3 trial 1	9	0	2	0	1	0
mouse 4 trial 1	0	1	1	0	0	1
mouse 1 trial 2	33	0	1	1	0	1
mouse 2 trial 2	42	22	1	10	0	0
mouse 3 trial 2	29	30	1	3	1	8
mouse 4 trial 2	25	4	1	2	11	7
mouse 1 trial 3	14	15	0	0	13	0
mouse 2 trial 3	33	12	12	13	4	5
mouse 3 trial 3	20	13	13	7	0	2
mouse 4 trial 3	15	12	13	2	1	11

## Sheet: C
	Direct	Corrected	Long Corrected	Focused Search	Serial	Random
Day 1	8.33333	0	8.33333	0	0	83.3333
Day 2	16.6667	25	0	0	0	58.3333
Day 3	16.6667	41.6667	0	0	8.33333	33.3333
Day 4	16.6667	41.6667	8.33333	0	16.6667	16.6667
Day 5	33.3333	41.6667	16.6667	0	0	8.33333
Day 6	25	33.3333	16.6667	16.6667	0	8.33333
Test	Day	Trial	File Name	Mouse #	Strategy num	Strategy name	cognitive Score		Tally Per day
1	1	1	day1 May23 1 1-male.slk	1	6	Random	0
2	1	2	day1 May23 2 2-male.slk	2	1	Direct	1		Direct	1	0.0833333
3	1	3	day1 May23 3 3-female.slk	3	6	Random	0		Corrected
4	1	4	day1 May23 4 4-female.slk	4	6	Random	0		Long Corrected	1	0.0833333
5	1	5	day1 May23 5 1-male.slk	1	3	Long correction	0.5		Serial
6	1	6	day1 May23 6 2-male.slk	2	6	Random	0		Random	10	0.833333
7	1	7	day1 May23 7 3-female.slk	3	6	Random	0		Focused Search
8	1	8	day1 May23 8 4-female.slk	4	6	Random	0
9	1	9	day1 May23 9 1-male.slk	1	6	Random	0
10	1	10	day1 May23 10 2-male.slk	2	6	Random	0
11	1	11	day1 May23 11 3-female.slk	3	6	Random	0
12	1	12	day1 May23 12 4-female.slk	4	6	Random	0		0.125
13	2	1	Day 2 May23 13 1-male.slk	1	2	Corrected	0.75
14	2	2	Day 2 May23 14 2-male.slk	2	1	Direct	1		Direct	2	0.166667
15	2	3	Day 2 May23 15 3-female.slk	3	6	Random	0		Corrected	3	0.25
16	2	4	Day 2 May23 16 4-female.slk	4	6	Random	0		Long Corrected
17	2	5	Day 2 May23 17 1-male.slk	1	1	Direct	1		Serial
18	2	6	Day 2 May23 18 2-male.slk	2	2	Corrected	0.75		Random	7	0.583333
19	2	7	Day 2 May23 19 3-female.slk	3	6	Random	0		Focused Search	0
20	2	8	Day 2 May23 20 4-female.slk	4	6	Random	0
21	2	9	Day 2 May23 21 1-male.slk	1	2	Corrected	0.75
22	2	10	Day 2 May23 22 2-male.slk	2	6	Random	0
23	2	11	Day 2 May23 23 3-female.slk	3	6	Random	0
24	2	12	Day 2 May23 24 4-female.slk	4	6	Random	0		0.354167
25	3	1	Day 3 May23 25 1-male.slk	1	6	Random	0
26	3	2	Day 3 May23 26 2-male.slk	2	2	Corrected	0.75		Direct	2	0.166667
27	3	3	Day 3 May23 27 3-female.slk	3	6	Random	0		Corrected	5	0.416667
28	3	4	Day 3 May23 28 4-female.slk	4	6	Random	0		Long Corrected	0
29	3	5	Day 3 May23 29 1-male.slk	1	1	Direct	1		Serial	1	0.0833333
30	3	6	Day 3 May23 30 2-male.slk	2	1	Direct	1		Random	4	0.333333
31	3	7	Day 3 May23 31 3-female.slk	3	6	Corrected	0.75		Focused Search	0
32	3	8	Day 3 May23 32 4-female.slk	4	6	Serial	0.25
33	3	9	Day 3 May23 33 1-male.slk	1	2	Corrected	0.75
34	3	10	Day 3 May23 34 2-male.slk	2	2	Corrected	0.75
35	3	11	Day 3 May23 35 3-female.slk	3	2	Corrected	0.75
36	3	12	Day 3 May23 36 4-female.slk	4	6	Random	0		0.5
37	4	1	Day 4 May23 37 1-male.slk	1	2	Corrected	0.75
38	4	2	Day 4 May23 38 2-male.slk	2	2	Corrected	0.75		Direct	2	0.166667
39	4	3	Day 4 May23 39 3-female.slk	3	2	Corrected	0.75		Corrected	5	0.416667
40	4	4	Day 4 May23 40 4-female.slk	4	6	Serial	0.25		Long Corrected	1	0.0833333
41	4	5	Day 4 May23 41 1-male.slk	1	2	Corrected	0.75		Serial	2	0.166667
42	4	6	Day 4 May23 42 2-male.slk	2	2	Corrected	0.75		Random	2	0.166667
43	4	7	Day 4 May23 43 3-female.slk	3	6	Long correction	0.5		Focused Search	0
44	4	8	Day 4 May23 44 4-female.slk	4	6	Serial	0.25				1
45	4	9	Day 4 May23 45 1-male.slk	1	6	Direct	1
46	4	10	Day 4 May23 46 2-male.slk	2	6	Random	0
47	4	11	Day 4 May23 47 3-female.slk	3	6	Direct	1		0.5625
48	5	1	Day 5 May23 49 1-male.slk	1	6	Long correction	0.5		Direct	4	0.333333
49	5	2	Day 5 May23 50 2-male.slk	2	6	Direct	1		Corrected	5	0.416667
50	5	3	Day 5 May23 51 3-female.slk	3	6	Direct	1		Long Corrected	2	0.166667
51	5	4	Day 5 May23 52 4-female.slk	4	6	Corrected	0.75		Serial	0
52	5	5	Day 5 May23 53 1-male.slk	1	2	Long correction	0.5		Random	1	2024-01-12
53	5	6	Day 5 May23 54 2-male.slk	2	6	Corrected	0.75		Focused Search	0
54	5	7	Day 5 May23 55 3-female.slk	3	6	Direct	1
55	5	8	Day 5 May23 56 4-female.slk	4	6	Corrected	0.75
56	5	9	Day 5 May23 57 1-male.slk	1	2	Corrected	0.75
57	5	10	Day 5 May23 58 2-male.slk	2	6	Direct	1
58	5	11	Day 5 May23 59 3-female.slk	3	6	Corrected	0.75
59	5	12	Day 5 May23 60 4-female.slk	4	6	Random	0		0.729167
60	6	1	Day 6 May23 61 1-male.slk	1	6	Direct	1
61	6	2	Day 6 May23 62 2-male.slk	2	6	Long correction	0.5		Direct	3	0.25
62	6	3	Day 6 May23 63 3-female.slk	3	6	Long correction	0.5		Corrected	4	0.333333
63	6	4	Day 6 May23 64 4-female.slk	4	6	Serial	0.25		Long Corrected	2	0.166667
64	6	5	Day 6 May23 65 1-male.slk	1	2	Corrected	0.75		Serial	2	0.166667
65	6	6	Day 6 May23 66 2-male.slk	2	2	Corrected	0.75		Random	0
66	6	7	Day 6 May23 67 3-female.slk	3	6	Corrected	0.75		Focused Search	1	0.0833333
67	6	8	Day 6 May23 68 4-female.slk	4	6	Serial	0.25
68	6	9	Day 6 May23 69 1-male.slk	1	2	Focused Search	0.5
69	6	10	Day 6 May23 70 2-male.slk	2	6	Direct	1
70	6	11	Day 6 May23 71 3-female.slk	3	6	Corrected	0.75
71	6	12	Day 6 May23 72 4-female.slk	4	6	Direct	1		0.666667

## Sheet: D_x0009_
Cognitive Score	Day 1	Day 2	Day 3	Day 4	Day 5	Day 6
	0	0.75	0	0.75	0.5	1
	1	1	0.75	0.75	1	0.5
	0	0	0	0.75	1	0.5				Scoring:
	0	0	0	0.25	0.75	0.25				Direct=1.0
	0.5	1	1	0.75	0.5	0.75				Corrected =.75
	0	0.75	1	0.75	0.75	0.75				Long Corrected and Focused Search =.5
	0	0	0.75	0.5	1	0.75				Serial = .25
	0	0	0.25	0.25	0.75	0.25				Random =0
	0	0.75	0.75	1	0.75	0.5
	0	0	0.75	0	1	1
	0	0	0.75	1	0.75	0.75
	0	0	0	0	0	1
Test	Day	Trial	File Name	Mouse #	Strategy num	Strategy name	cognitive Score
1	1	1	day1 May23 1 1-male.slk	1	6	Random	0
2	1	2	day1 May23 2 2-male.slk	2	1	Direct	1
3	1	3	day1 May23 3 3-female.slk	3	6	Random	0
4	1	4	day1 May23 4 4-female.slk	4	6	Random	0
5	1	5	day1 May23 5 1-male.slk	1	3	Long correction	0.5
6	1	6	day1 May23 6 2-male.slk	2	6	Random	0
7	1	7	day1 May23 7 3-female.slk	3	6	Random	0
8	1	8	day1 May23 8 4-female.slk	4	6	Random	0
9	1	9	day1 May23 9 1-male.slk	1	6	Random	0
10	1	10	day1 May23 10 2-male.slk	2	6	Random	0
11	1	11	day1 May23 11 3-female.slk	3	6	Random	0
12	1	12	day1 May23 12 4-female.slk	4	6	Random	0
13	2	1	Day 2 May23 13 1-male.slk	1	2	Corrected	0.75
14	2	2	Day 2 May23 14 2-male.slk	2	1	Direct	1
15	2	3	Day 2 May23 15 3-female.slk	3	6	Random	0
16	2	4	Day 2 May23 16 4-female.slk	4	6	Random	0
17	2	5	Day 2 May23 17 1-male.slk	1	1	Direct	1
18	2	6	Day 2 May23 18 2-male.slk	2	2	Corrected	0.75
19	2	7	Day 2 May23 19 3-female.slk	3	6	Random	0
20	2	8	Day 2 May23 20 4-female.slk	4	6	Random	0
21	2	9	Day 2 May23 21 1-male.slk	1	2	Corrected	0.75
22	2	10	Day 2 May23 22 2-male.slk	2	6	Random	0
23	2	11	Day 2 May23 23 3-female.slk	3	6	Random	0
24	2	12	Day 2 May23 24 4-female.slk	4	6	Random	0
25	3	1	Day 3 May23 25 1-male.slk	1	6	Random	0
26	3	2	Day 3 May23 26 2-male.slk	2	2	Corrected	0.75
27	3	3	Day 3 May23 27 3-female.slk	3	6	Random	0
28	3	4	Day 3 May23 28 4-female.slk	4	6	Random	0
29	3	5	Day 3 May23 29 1-male.slk	1	1	Direct	1
30	3	6	Day 3 May23 30 2-male.slk	2	1	Direct	1
31	3	7	Day 3 May23 31 3-female.slk	3	6	Corrected	0.75
32	3	8	Day 3 May23 32 4-female.slk	4	6	Serial	0.25
33	3	9	Day 3 May23 33 1-male.slk	1	2	Corrected	0.75
34	3	10	Day 3 May23 34 2-male.slk	2	2	Corrected	0.75
35	3	11	Day 3 May23 35 3-female.slk	3	2	Corrected	0.75
36	3	12	Day 3 May23 36 4-female.slk	4	6	Random	0
37	4	1	Day 4 May23 37 1-male.slk	1	2	Corrected	0.75
38	4	2	Day 4 May23 38 2-male.slk	2	2	Corrected	0.75
39	4	3	Day 4 May23 39 3-female.slk	3	2	Corrected	0.75
40	4	4	Day 4 May23 40 4-female.slk	4	6	Serial	0.25
41	4	5	Day 4 May23 41 1-male.slk	1	2	Corrected	0.75
42	4	6	Day 4 May23 42 2-male.slk	2	2	Corrected	0.75
43	4	7	Day 4 May23 43 3-female.slk	3	6	Long correction	0.5
44	4	8	Day 4 May23 44 4-female.slk	4	6	Serial	0.25
45	4	9	Day 4 May23 45 1-male.slk	1	6	Direct	1
46	4	10	Day 4 May23 46 2-male.slk	2	6	Random	0
47	4	11	Day 4 May23 47 3-female.slk	3	6	Direct	1
48	5	1	Day 5 May23 49 1-male.slk	1	6	Long correction	0.5
49	5	2	Day 5 May23 50 2-male.slk	2	6	Direct	1
50	5	3	Day 5 May23 51 3-female.slk	3	6	Direct	1
51	5	4	Day 5 May23 52 4-female.slk	4	6	Corrected	0.75
52	5	5	Day 5 May23 53 1-male.slk	1	2	Long correction	0.5
53	5	6	Day 5 May23 54 2-male.slk	2	6	Corrected	0.75
54	5	7	Day 5 May23 55 3-female.slk	3	6	Direct	1
55	5	8	Day 5 May23 56 4-female.slk	4	6	Corrected	0.75
56	5	9	Day 5 May23 57 1-male.slk	1	2	Corrected	0.75
57	5	10	Day 5 May23 58 2-male.slk	2	6	Direct	1
58	5	11	Day 5 May23 59 3-female.slk	3	6	Corrected	0.75
59	5	12	Day 5 May23 60 4-female.slk	4	6	Random	0
60	6	1	Day 6 May23 61 1-male.slk	1	6	Direct	1
61	6	2	Day 6 May23 62 2-male.slk	2	6	Long correction	0.5
62	6	3	Day 6 May23 63 3-female.slk	3	6	Long correction	0.5
63	6	4	Day 6 May23 64 4-female.slk	4	6	Serial	0.25
64	6	5	Day 6 May23 65 1-male.slk	1	2	Corrected	0.75
65	6	6	Day 6 May23 66 2-male.slk	2	2	Corrected	0.75
66	6	7	Day 6 May23 67 3-female.slk	3	6	Corrected	0.75
67	6	8	Day 6 May23 68 4-female.slk	4	6	Serial	0.25
68	6	9	Day 6 May23 69 1-male.slk	1	2	Focused Search	0.5
69	6	10	Day 6 May23 70 2-male.slk	2	6	Direct	1
70	6	11	Day 6 May23 71 3-female.slk	3	6	Corrected	0.75
71	6	12	Day 6 May23 72 4-female.slk	4	6	Direct	1
