# Supplementary material for: Cellular and circuit features distinguish mouse dentate gyrus semilunar granule cells and granule cells activated during contextual memory formation
Source: eLife. 2025 Aug 27;13:RP101428. doi: 10.7554/eLife.101428 (PMC12387755; doi:10.7554/eLife.101428)
Supplement: Figure 1—source data 1. [file elife-101428-fig1-data1.xlsx]

## Sheet: E
# of tdT Labeled Cells	BM	EE
	10	36
	20	31
	9	38		Nested t test
	3	26		P value	0.0409
	12	101		P value summary	*
	17	64		Significantly different (P < 0.05)?	Yes
	14	87		One- or two-tailed P value?	Two-tailed
	16	62		t, df	t=2.596, df=6
	11	74		F, DFn, Dfd	6.738, 1, 6
	6	35
	10	48
	17	28
	14	26
	26	36
	19	55
	15	26
	8	36
	7	13
	10	35
	18	37
	18	27
	15	22
	11	14
	14	9
	21	18
	9	22
	16	16
	6	31
	4	11
	11	14
	13	33
	12	42
	15	34
	17	33
	21	15
	18	13
	19	28
	12	37
	9	20
	14	23

## Sheet: F
% of Cells in Upper Blade	BM	EE
	60	77.7778
	65	67.7419
	66.6667	89.4737
	66.6667	84.6154		Mann Whitney test
	75	98.0198		P value	0.0019
	82.3529	79.6875		Exact or approximate P value?	Exact
	64.2857	72.4138		P value summary	**
	68.75	88.7097		Significantly different (P < 0.05)?	Yes
	63.6364	79.7297		One- or two-tailed P value?	Two-tailed
	66.6667	100		Sum of ranks in column A,B	1302 , 1938
	100	79.1667		Mann-Whitney U	482
	58.8235	82.1429
	50	96.1538
	76.9231	80.5556
	63.1579	56.3636
	93.3333	92.3077
	100	91.6667
	57.1429	92.3077
	90	100
	77.7778	100
	93.75	92.5926
	66.6667	86.3636
	72.7273	100
	78.5714	100
	76.1905	94.4444
	77.7778	95.4545
	81.25	94.4444
	83.3333	95.8333
	100	93.75
	90.9091	78.5714
	100	78.7879
	83.3333	57.1429
	86.6667	100
	58.8235	100
	76.1905	53.3333
	77.7778	61.5385
	89.4737	92.8571
	83.3333	89.1892
	88.8889	100
	84.6154	82.6087

## Sheet: G
# of co-labeled / # of tdt labeled	BM	EE
	0	2.7778
	0	0
	0	10.5263			Nested t test
	0	3.8462			P value	0.0003
	0	7.9208			P value summary	***
	0	6.25			Significantly different (P < 0.05)?	Yes
	0	5.7471			One- or two-tailed P value?	Two-tailed
	6.25	3.2258			t, df	t=3.777, df=78
	9.0909	6.7568			F, DFn, Dfd	14.27, 1, 78
	0	5.7143
	10	6.25
	0	10.7143
	7.1429	7.6923
	3.8462	2.7778
	0	3.6364
	0	11.5385
	0	8.3333
	14.2857	7.6923
	0	0
	5.5556	16.2162
	0	3.7037
	0	0
	9.0909	0
	0	33.3333
	0	0
	0	9.0909
	6.25	0
	0	0
	0	18.1818
	0	7.1429
	0	12.1212
	8.3333	2.381
	0	11.7647
	5.8824	15.1515
	0	0
	5.5556	7.6923
	0	7.1429
	0	10.8108
	0	5
	0	0

## Sheet: I
% SGC	BM	EE
	50	27.7778
	40	45.1613		Nested t test
	22.2222	42.1053		P value	0.1143
	33.3333	42.3077		P value summary	ns
	25	36.6337		Significantly different (P < 0.05)?	No
	29.4118	34.375		One- or two-tailed P value?	Two-tailed
	28.5714	41.3793		t, df	t=1.847, df=6
	37.5	29.0323		F, DFn, Dfd	3.412, 1, 6
	54.5455	27.027
	66.6667	22.8571
	50	34.375
	23.5294	41.3793
	28.5714	29.0323
	23.0769	27.027
	26.3158	22.8571
	33.3333	23.0769
	50	25
	28.5714	38.4615
	40	17.1429
	22.2222	10.8108
	37.5	22.2222
	26.6667	13.6364
	45.4545	28.5714
	14.2857	33.3333
	23.8095	22.2222
	44.4444	22.7273
	25	22.2222
	33.3333	37.5
	50	43.75
	45.4545	28.5714
	46.1538	21.2121
	41.6667	19.0476
	20	26.4706
	29.4118	33.3333
	28.5714	26.6667
	27.7778	38.4615
	26.3158	14.2857
	25	18.9189
	22.2222	5
	28.5714	17.3913
