# Supplementary material for: Cellular and circuit features distinguish mouse dentate gyrus semilunar granule cells and granule cells activated during contextual memory formation
Source: eLife. 2025 Aug 27;13:RP101428. doi: 10.7554/eLife.101428 (PMC12387755; doi:10.7554/eLife.101428)
Supplement: Figure 2—figure supplement 1—source data 1. [file elife-101428-fig2-figsupp1-data1.xlsx]

## Sheet: A
Cell type	#
Labeled SGC	22
Labeled GC	9
Unlabeled SGC	11
Unlabeled GC	12

## Sheet: B
Threshold (mV)
	Unlabeled															Labeled
GC	-28.0762	-37.262	-43.8843	-36.499	-37.1094	-34.6375	-39.5813	-45.7764	-36.1633	-43.0908	-43.457					-37.9639	-36.9873	-43.0603	-25.5127	-42.6636	-38.6658	-50.5371	-36.4685	-34.8206	-46.4172
SGC	-32.5928	-39.4592	-31.7688	-36.377	-36.1023	-36.9568	-40.7104	-42.511	-40.0696	-36.6821	-38.9099					-47.76	-37.4451	-34.6375	-38.1775	-41.4734	-37.1094	-36.8958	-34.3323	-42.0227	-47.1802	-34.3628	-32.196	-32.1655	-34.4849
ANOVA table	SS (Type III)	DF	MS	F (DFn, DFd)	P value
Interaction	0.1336	1	0.1336	F (1, 42) = 0.004967	P=0.9441
Row Factor	19.93	1	19.93	F (1, 42) = 0.7407	P=0.3943
Column Factor	3.013	1	3.013	F (1, 42) = 0.1120	P=0.7395
Residual	1130	42	26.9
Šídák's multiple comparisons test	Predicted (LS) mean diff.	95.00% CI of diff.	Below threshold?	Summary	Adjusted P Value
GC:Unlabeled vs. GC:Labeled	0.6245	-5.273 to 6.522	No	ns	0.9978
SGC:Unlabeled vs. SGC:Labeled	0.4072	-5.031 to 5.845	No	ns	0.9994
GC:Unlabeled vs. SGC:Unlabeled	-1.218	-6.973 to 4.537	No	ns	0.9703
GC:Labeled vs. SGC:Labeled	-1.435	-7.023 to 4.153	No	ns	0.9412

## Sheet: C
Amplitude (mV)
	Unlabeled																			Labeled
GC	50.3845	81.4209	70.6177	85.7849	63.8428	83.2825	83.0688	91.6748	78.0334	77.1484	86.6089									76.0803	84.9304	77.8503	31.311	92.4072	71.167	82.428	85.6323	76.3855	76.2329
SGC	56.5491	69.9463	76.8433	83.0688	79.01	83.8623	89.6606	88.7756	89.386	67.2607	78.3386									88.2568	67.1997	86.4563	78.0029	89.0808	86.4258	80.0781	75.1648	81.604	84.6863	72.9675	62.0728	66.803	89.2639	73.0896	78.7659	89.325
ANOVA table	SS (Type III)	DF	MS	F (DFn, DFd)	P value
Interaction	25.37	1	25.37	F (1, 45) = 0.1842	P=0.6698
Cell Type	70.76	1	70.76	F (1, 45) = 0.5138	P=0.4772
Treatment	3.3	1	3.3	F (1, 45) = 0.02396	P=0.8777
Residual	6198	45	137.7
Šídák's multiple comparisons test	Predicted (LS) mean diff.	95.00% CI of diff.	Below threshold?	Summary	Adjusted P Value
GC:Unlabeled vs. GC:Labeled	2	-11.30 to 15.30	No	ns	0.9917
SGC:Unlabeled vs. SGC:Labeled	-0.9398	-12.72 to 10.84	No	ns	0.9993
GC:Unlabeled vs. SGC:Unlabeled	-0.9849	-13.97 to 12.00	No	ns	0.9994
GC:Labeled vs. SGC:Labeled	-3.925	-16.06 to 8.210	No	ns	0.8754

## Sheet: D
Half Width (ms)
	Unlabeled																	Labeled
GC	0.880053	0.707278	0.822663	0.727785	0.745	0.767727	0.782588	0.97	0.897694	0.867689	0.872626							0.645522	0.707273	0.832839	0.813131	0.71	0.753081	0.987516	0.71	0.624776	0.787647
SGC	0.828067	0.872899	0.727542	0.758081	0.725196	0.757849	0.752513	0.685	0.757374	0.792542	0.812487							0.637848	0.910646	0.652484	0.917594	0.902475	0.852143	0.817839	0.762778	0.862739	0.805585	0.942671	0.842983	0.862929	0.697595	0.8	0.712848	0.747424
ANOVA table	SS (Type III)	DF	MS	F (DFn, DFd)	P value
Interaction	0.03075	1	0.03075	F (1, 45) = 4.130	P=0.0481
Row Factor	7.277e-06	1	7.277e-06	F (1, 45) = 0.0009773	P=0.9752
Column Factor	0.002162	1	0.002162	F (1, 45) = 0.2903	P=0.5927
Residual	0.335	45	0.007445
Šídák's multiple comparisons test	Predicted (LS) mean diff.	95.00% CI of diff.	Below threshold?	Summary	Adjusted P Value
GC:Labeled vs. GC:Unlabeled	-0.06474	-0.1626 to 0.03307	No	ns	0.3227
SGC :Labeled vs. SGC :Unlabeled	0.0376	-0.04902 to 0.1242	No	ns	0.7098
GC:Labeled vs. SGC :Labeled	-0.05039	-0.1396 to 0.03883	No	ns	0.4775
SGC :Unlabeled vs. GC:Unlabeled	-0.05196	-0.1474 to 0.04350	No	ns	0.5133

## Sheet: E
Fast afterhyperpolarization (mV)
	Unlabeled																	Labeled
GC	-12.7563	-12.9395	-9.30786	-11.9019	-6.31714	-18.4326	-15.5945	-10.8948	-13.5498	-14.4043	-10.376							-11.4136	-13.2446	-12.3596	-11.1084	-16.4795	-18.4326	-17.7307	-5.31006
SGC	-14.8926	-6.50024	-21.5454	-14.6484	-18.3716	-21.2708	-12.7563	-13.1226	-14.679	-13.2141	-14.4043							-14.8315	-13.0615	-14.9841	-0.396729	-18.0054	-0.946045	-14.2822	-18.8293	-12.5427	-15.9912	-13.3362	-10.4065	-2.38037	-16.4185	-17.0898	-18.0359	-13.7024
ANOVA table	SS (Type III)	DF	MS	F (DFn, DFd)	P value
Interaction	28.51	1	28.51	F (1, 43) = 1.269	P=0.2662
Row Factor	11.29	1	11.29	F (1, 43) = 0.5024	P=0.4823
Column Factor	6.34	1	6.34	F (1, 43) = 0.2822	P=0.5980
Residual	966	43	22.46
Šídák's multiple comparisons test	Predicted (LS) mean diff.	95.00% CI of diff.	Below threshold?	Summary	Adjusted P Value
GC:Labeled vs. GC:Unlabeled	-0.8531	-6.578 to 4.872	No	ns	0.9919
SGC:Labeled vs. SGC:Unlabeled	2.376	-2.392 to 7.143	No	ns	0.5947
GC:Labeled vs. SGC:Labeled	-0.5987	-5.881 to 4.684	No	ns	0.9972
GC:Unlabeled vs. SGC:Unlabeled	2.63	-2.624 to 7.884	No	ns	0.5905

## Sheet: F
medium afterhyperpolarization
	Unlabeled																	Labeled
GC	-10.4675	-7.96509	-5.7373	-7.44629	-4.08936	-14.3127	-10.9253	-2.53296	-7.96509	-9.06372	-6.22559							-9.24683	-10.498	-8.36182	-5.15747	-14.4958	-15.0146	-14.7095	-0.366211
SGC	-13.5498	-2.56348	-16.8762	-8.81958	-13.7329	-17.9443	-9.3689	-10.1013	-9.18579	-10.376	-10.376							-15.564	-9.12476	-16.0217	1.708984375*	-15.686	1.770019531*	-12.1765	-12.0239	-9.91821	-8.39233	-9.33838	-6.22559	-1.31226	-15.9912	-15.2893	-13.2141	-14.1907
ANOVA table	SS (Type III)	DF	MS	F (DFn, DFd)	P value
Interaction	5.155	1	5.155	F (1, 41) = 0.2897	P=0.5933
Row Factor	72.05	1	72.05	F (1, 41) = 4.049	P=0.0508
Column Factor	14.23	1	14.23	F (1, 41) = 0.7999	P=0.3763
Residual	729.6	41	17.79
Šídák's multiple comparisons test	Predicted (LS) mean diff.	95.00% CI of diff.	Below threshold?	Summary	Adjusted P Value
GC:Unlabeled vs. GC:Labeled	1.847	-3.259 to 6.953	No	ns	0.8233
SGC:Unlabeled vs. SGC:Labeled	0.4591	-3.903 to 4.821	No	ns	0.9979
GC:Unlabeled vs. SGC:Unlabeled	3.288	-1.398 to 7.973	No	ns	0.2675
GC:Labeled vs. SGC:Labeled	1.9	-2.911 to 6.711	No	ns	0.7728

## Sheet: G
Latency (ms)
	Unlabeled																	Labeled
GC	640.5	462.4	220.3	127.4	255.6	82	292	174.1	225	232.2	180.6							576.4	245.5	220	202.1	73.9	255.7	170.3	82
SGC	188.5	174.5	298.4	164.2	191.7	206.3	200.3	120.8	150.6	116.1	181.6							379.1	132	508.3	107.4	142.2	125.5	217.4	210.3	112.3	120.6	216.4	155.8	134.2	322.9	175	228.3
ANOVA table	SS (Type III)	DF	MS	F (DFn, DFd)	P value
Interaction	9419	1	9419	F (1, 42) = 0.6229	P=0.4344
Row Factor	29564	1	29564	F (1, 42) = 1.955	P=0.1694
Column Factor	291.8	1	291.8	F (1, 42) = 0.01930	P=0.8902
Residual	635075	42	15121
Šídák's multiple comparisons test	Predicted (LS) mean diff.	95.00% CI of diff.	Below threshold?	Summary	Adjusted P Value
GC:Unlabeled vs. GC:Labeled	34.68	-114.0 to 183.4	No	ns	0.9579
SGC:Unlabeled vs. SGC:Labeled	-24.3	-149.6 to 101.0	No	ns	0.9784
GC:Labeled vs. SGC:Labeled	22.76	-115.8 to 161.3	No	ns	0.9883
GC:Unlabeled vs. SGC:Unlabeled	81.74	-54.71 to 218.2	No	ns	0.4179
