# Supplementary material for: Cellular and circuit features distinguish mouse dentate gyrus semilunar granule cells and granule cells activated during contextual memory formation
Source: eLife. 2025 Aug 27;13:RP101428. doi: 10.7554/eLife.101428 (PMC12387755; doi:10.7554/eLife.101428)
Supplement: Figure 2—source data 1. [file elife-101428-fig2-data1.xlsx]

## Sheet: C
Resting Membrane Potential (mV)
	Unlabeled																	Labeled
GC	-71.4	-77	-67.7	-86.6	-85.6	-77.9	-85.8	-81.3	-77.2	-87.6								-84.2	-82.1	-83.9	-79.1	-71.9	-72.8	-88.7	-83	-74.6
SGC	-78	-72	-89.6	-89.3	-87.5	-81.3	-89.9	-83	-85.2	-73.8	-71.6							-83	-71.5	-71.9	-79.7	-88.5	-83.4	-79.4	-82	-78.4	-79	-73.6	-80.5	-85
ANOVA table	SS (Type III)	DF	MS	F (DFn, DFd)	P value
Interaction	16.05	1	16.05	F (1, 39) = 0.4189	P=0.5213
SGC vs GC	8.254	1	8.254	F (1, 39) = 0.2155	P=0.6451
Labeled vs Unlabeled	10.76	1	10.76	F (1, 39) = 0.2809	P=0.5991
Residual	1494	39	38.3
Šídák's multiple comparisons test	Predicted (LS) mean diff.	95.00% CI of diff.	Below threshold?	Summary	Adjusted P Value
GC:Unlabeled vs. GC:Labeled	0.2233	-7.202 to 7.649	No	ns	>0.9999
SGC:Unlabeled vs. SGC:Labeled	-2.243	-8.863 to 4.378	No	ns	0.854
GC:Unlabeled vs. SGC:Unlabeled	2.117	-4.944 to 9.178	No	ns	0.9005
GC:Labeled vs. SGC:Labeled	-0.3487	-7.356 to 6.659	No	ns	0.9999

## Sheet: D
Rin (Mohms)
	Unlabeled													Labeled
GC	172.873	255.126	185.062	216.495	141.452	127.312	136.942	129.051	210.062	173.063	111.543			128.957	118.073	142.098	100.143	157.631	160.934	171.337	114.039	154.996	199.668	133.382
SGC	169.195	129.037	107.483	114.377	132.11	162.161	114.224	78.6701	119.013	137.35	149.052			89.3789	138.115	107.14	144.18	115.465	112.312	157.841	110.94	128.071	74.0643	121.93	113.596	112.555	142.391	59.3406	140.16	84.6403	138.314	95.162
ANOVA table	SS (Type III)	DF	MS	F (DFn, DFd)	P value
Interaction	431.9	1	431.9	F (1, 48) = 0.4385	P=0.5110
SGC vs GC	14758	1	14758	F (1, 48) = 14.98	P=0.0003
Labeled vs Unlabeled	4589	1	4589	F (1, 48) = 4.660	P=0.0359
Residual	47273	48	984.8
Šídák's multiple comparisons test	Predicted (LS) mean diff.	95.00% CI of diff.	Below threshold?	Summary	Adjusted P Value
GC:Unlabeled vs. GC:Labeled	25.25	-9.381 to 59.88	No	ns	0.2365
SGC:Unlabeled vs. SGC:Labeled	13.39	-17.37 to 44.16	No	ns	0.7091
GC:Unlabeled vs. SGC:Unlabeled	40.57	5.945 to 75.20	Yes	*	0.0155
GC:Labeled vs. SGC:Labeled	28.72	-2.049 to 59.49	No	ns	0.076

## Sheet: G
Firing Frequency (Hz) at Different Stim Intensities
		Labeled SGC																								Labeled GC										Unlabeled SGC
	Stim Intensity	Cell 1	Cell 2	Cell 3	Cell 4	Cell 5	Cell 6	Cell 7	Cell 8	Cell 9	Cell 10	Cell 11	Cell 12	Cell 13	Cell 14	Cell 15	Cell 16	Cell 17	Cell 18	Cell 19	Cell 20	Cell 21	Cell 22			Cell 1	Cell 2	Cell 3	Cell 4	Cell 5	Cell 6	Cell 7	Cell 8	Cell 9		Cell 1	Cell 2	Cell 3	Cell 4	Cell 5	Cell 6	Cell 7	Cell 8	Cell 9	Cell 10	Cell 11
	40	0	0	0	0	13	0	0	0	0	6	0	0	0	0	0	0	0	0	1	2	0	0			0	5	0	0	1	0	3	6	0		2	0	0	6	0	11	5	0	7	7	1
	80	15	10	2	4	25	0	0	12	0	16	0	7	0	8	0	1	7	0	6	14	9	6			0	20	0	3	10	0	13	14	4		11	0	3	18	5	23	15	13	17	18	8
	120	25	15	9	9	32	1	0	22	8	23	5	16	11	15	0	6	15	9	14	21	19	12			7	30	4	9	14	0	19	19	10		17	0	11	25	9	33	23	20	24	25	13
	160	34	21	14	13	38	7	2	31	15	28	14	21	18	21	0	10	21	15	19	27	27	17			18	36	22	14	18	2	24	24	13		24	1	15	28	16	41	30	26	29	33	19
	200	41	26	18	16	42	12	13	38	22	34	19	26	25	31	1	13	27	21	21	34	32	22			26	28	30	18	21	11	29	28	19		29	1	22	18	20	50	36	33	35	39	23
	240	49	30	22	20	45	15	10	45	27	39	23	30	32	36	3	16	30	24	21	38	38	25			33	21		22	24	15	34	31	22		34	8	27	14	23	56	42	38	37	45	27
	280	53	34	25	22	48	19	13	50	32	44	24	34	38	41	6	21	33	30	25	42	42	28			39			26	25	18	37	33	28		39	17	32	9	27	61	45	41	40	52	29
	320	57	38	27	24	52	23	11	55	37	47	28	39	42	47	7	21	37	33	21	47	43	33			44			28	23	23	40	35	31		43	27	35	8	30	68	49	45	41	57	34
	360	62	41	29	27	54	25	10	60	41	51	33	43	47	52	11	20	39	35	15	48	31	36			48			31	19	24	44	30	31		47	31	37	7	32	72	52	48	42	61	31
	400	64	44		28	57		12	64	39	56	35	47	51	57	11	23	39	38	14	50	28	35			53			33	19	28	42	25	29		49	33	40		33	75	53	50	35	64	23
	440		46		26	58			69		59	36	48	56	60	10	24	28	39	12	53	27	35						32	12	27	33	21	26		49	41	41		36	61	56	52	30	56	23
	480		49		21	60					62	39	52	58	64	11	20	25	32	10	56	21	33						26	12	29	31	21	22		41	46	43		40	53	54	56	25	45	21
	520		52		19	61					67	39	55	61	67	12	14	20	30	9	58	19	25						24	9	30	26	18	19		32	49	44		43	48	44	51	22	40
	560		54		15	62					68	41	57	65	70	9			23	7	60	18	22						23	12	21	23	17	20		31		43		45	39	33	46	14	42
	ANOVA table	SS (Type III)	DF	MS	F (DFn, DFd)	P value
	Stim Intensity	66779	13	5137	F (13, 630) = 32.62	P<0.0001
	Labeled vs Unlabeled	1959	1	1959	F (1, 630) = 12.44	P=0.0005
	SGC vs GC	6074	1	6074	F (1, 630) = 38.58	P<0.0001
	Stim Intensity x Labeled vs Unlabeled	498.2	13	38.32	F (13, 630) = 0.2434	P=0.9972
	Stim Intensity x SGC vs GC	8153	13	627.2	F (13, 630) = 3.983	P<0.0001
	Labeled vs Unlabeled x SGC vs GC	1.703	1	1.703	F (1, 630) = 0.01081	P=0.9172
	Stim Intensity x Labeled vs Unlabeled x SGC vs GC	407.1	13	31.32	F (13, 630) = 0.1989	P=0.9990
	Residual	99200	630	157.5

## Sheet: H
Ratio of Frequency at 520 pA and Max Frequency	Unlabeled											Labeled
GC	1	0.333333	0.105263	0.410714	0.510204	0.243243	0.761905	0.191489	0.755556			0.642857	0.727273	0.375	1	0.619048	0.514286	0.612903
SGC	0.653061	1	1	1	0.64	0.785714	0.910714	0.52381	0.625			1	0.678571	1	1	1	1	1	1	1	0.583333	0.512821	0.769231	0.36	1	0.44186	0.694444
ANOVA table	SS (Type III)	DF	MS	F (DFn, DFd)	P value
Interaction	0.04628	1	0.04628	F (1, 37) = 0.8241	P=0.3698
SGC vs GC	0.5557	1	0.5557	F (1, 37) = 9.896	P=0.0033
Labeled vs Unlabeled	0.07954	1	0.07954	F (1, 37) = 1.416	P=0.2416
Residual	2.078	37	0.05616
Šídák's multiple comparisons test	Predicted (LS) mean diff.	95.00% CI of diff.	Below threshold?	Summary	Adjusted P Value
GC:Unlabeled vs. GC:Labeled	-0.1625	-0.4752 to 0.1501	No	ns	0.5517
SGC:Unlabeled vs. SGC:Labeled	-0.02187	-0.2804 to 0.2366	No	ns	0.9991
GC:Unlabeled vs. SGC:Unlabeled	-0.3141	-0.6065 to -0.02161	Yes	*	0.031
GC:Labeled vs. SGC:Labeled	-0.1734	-0.4545 to 0.1077	No	ns	0.3862

## Sheet: I
Spike Amplitude Attenuation	Unlabeled									Labeled
GC	0.396966	0.978413	0.286531	0.699169	0.568606	0.529392	0.134137	0.666066		0.673594	0.451131	0.616461	0.580025	0.516088	0.637304	0.43047	0.486898
SGC	0.848118	0.808912	0.637089	0.679078	0.727578	0.548729	0.752078	0.4633		0.838946	0.878218	0.817271	0.91957	0.92	0.876553	0.899486	0.883039	0.660415	0.747025	0.451389	0.592055	0.534851
ANOVA table	SS (Type III)	DF	MS	F (DFn, DFd)	P value
Interaction	0.01115	1	0.01115	F (1, 33) = 0.3814	P=0.5411
SGC vs GC	0.3068	1	0.3068	F (1, 33) = 10.50	P=0.0027
Labeled vs Unlabeled	0.024	1	0.024	F (1, 33) = 0.8213	P=0.3714
Residual	0.9645	33	0.02923
Šídák's multiple comparisons test	Predicted (LS) mean diff.	95.00% CI of diff.	Below threshold?	Summary	Adjusted P Value
GC:Unlabeledvs. SGC: Unlabeled	-0.1507	-0.3759 to 0.07447	No	ns	0.3057
GC:Labeledvs. SGC:Labeled	-0.2217	-0.4240 to -0.01932	Yes	*	0.0271
GC:Unlabeled vs. GC:Labeled	-0.01659	-0.2418 to 0.2086	No	ns	0.9995
SGC:Unlabeled vs. SGC:Labeled	-0.08757	-0.2899 to 0.1148	No	ns	0.7042

## Sheet: J
Spike Frequency Adaptation
	Unlabeled																	Labeled
GC	0.44707	0.181818	0.103041	0.117512	0.744325	0.293605	0.328054	0.15748	0.258427	0.268786	0.169643							0.653333	0.42283	0.496337	0.0487145	0.386236	0.336093	0.219269	0.0538358
SGC	0.679595	0.588406	0.457831	0.340489	0.497382	0.427326	0.867117	0.373606	0.230937	0.544304	0.115578							0.970478	1.05017	0.618462	0.791837	1.42034	0.570732	0.932056	0.78281	0.728351	0.456187	0.90339	0.0902587	0.821429	0.724907	0.907655
ANOVA table	SS (Type III)	DF	MS	F (DFn, DFd)	P value
Interaction	0.1965	1	0.1965	F (1, 41) = 3.477	P=0.0694
SGC vs GC	1.111	1	1.111	F (1, 41) = 19.66	P<0.0001
Labeled vs Unlabeled	0.3605	1	0.3605	F (1, 41) = 6.379	P=0.0155
Residual	2.317	41	0.05651
Šídák's multiple comparisons test	Predicted (LS) mean diff.	95.00% CI of diff.	Below threshold?	Summary	Adjusted P Value
GC:Unlabeled vs. GC:Labeled	-0.04801	-0.3358 to 0.2397	No	ns	0.9876
SGC:Unlabeled vs. SGC:Labeled	-0.3189	-0.5647 to -0.07309	Yes	**	0.0064
GC:Unlabeled vs. SGC:Unlabeled	-0.1866	-0.4507 to 0.07744	No	ns	0.2611
GC:Labeled vs. SGC:Labeled	-0.4575	-0.7286 to -0.1864	Yes	***	0.0003
