# Supplementary material for: Cellular and circuit features distinguish mouse dentate gyrus semilunar granule cells and granule cells activated during contextual memory formation
Source: eLife. 2025 Aug 27;13:RP101428. doi: 10.7554/eLife.101428 (PMC12387755; doi:10.7554/eLife.101428)
Supplement: Figure 4—figure supplement 1—source data 1. [file elife-101428-fig4-figsupp1-data1.xlsx]

## Sheet: Sheet1
	IPSCs Amp pA)	IPSCs Amp pA)	IPSCs Amp pA)
	ROI1	ROI2	ROI3
	1177.43	624.862	435.678			ANOVA summary
	408.078	265.205	197.377			F	12.96		Holm-Šídák's multiple comparisons test	Mean diff.	Below threshold?	Summary	Adjusted P Value
	1407.21	808.57	139.283			P value	0.0004		ROI1 vs. ROI2	325.1	Yes	*	0.0303
	616.289	591.203	242.732			P value summary	***		ROI1 vs. ROI3	673.4	Yes	***	0.0003
	940.359	499.929	327.866			Significant diff. among means (P < 0.05)?	Yes		ROI2 vs. ROI3	348.3	Yes	*	0.0214
		686.955	129.096			R squared	0.6039
		716.692	134.704							ROI1	ROI2	ROI3
			285.116						Mean	909.9	584.8	236.5
									SEM	181.4	68.59	38.57
