# Supplementary material for: Cellular and circuit features distinguish mouse dentate gyrus semilunar granule cells and granule cells activated during contextual memory formation
Source: eLife. 2025 Aug 27;13:RP101428. doi: 10.7554/eLife.101428 (PMC12387755; doi:10.7554/eLife.101428)
Supplement: Figure 5—figure supplement 1—source data 1. [file elife-101428-fig5-figsupp1-data1.xlsx]

## Sheet: Sheet1
	Avarage IEI	Avarage IEI
	aCSF	TTX		Wilcoxon matched-pairs signed rank test						aCSF	TTX
	3.63047	6.1594		P value	0.0005				Number of values	12	12
	5.16537	5.69196		Exact or approximate P value?	Exact
	3.539	7.10473		P value summary	***				Minimum	1.266	2.385
	6.44465	9.27815		Significantly different (P < 0.05)?	Yes				25% Percentile	3.562	6.104
	1.26605	2.38456		One- or two-tailed P value?	Two-tailed				Median	4.514	8.144
	4.55537	14.9558		Sum of positive, negative ranks	78.00 , 0.000				75% Percentile	6.393	18.23
	12.422	31.0825		Sum of signed ranks (W)	78				Maximum	12.42	31.51
	8.53116	19.3195		Number of pairs	12
	6.23747	31.5075		Number of ties (ignored)	0				Mean	5.292	12.49
	4.30804	8.58319							Std. Deviation	2.913	9.849
	4.47243	7.70432		Median of differences					Std. Error of Mean	0.841	2.843
	2.93215	6.0858		Median	3.399
									Lower 95% CI	3.441	6.231
				How effective was the pairing?					Upper 95% CI	7.143	18.75
				rs (Spearman)	0.7762
				P value (one tailed)	0.0022
				P value summary	**
				Was the pairing significantly effective?	Yes
