# Supplementary material for: Cellular and circuit features distinguish mouse dentate gyrus semilunar granule cells and granule cells activated during contextual memory formation
Source: eLife. 2025 Aug 27;13:RP101428. doi: 10.7554/eLife.101428 (PMC12387755; doi:10.7554/eLife.101428)
Supplement: Figure 5—source data 1. [file elife-101428-fig5-data1.xlsx]

## Sheet: GC labeled-unlabeled
Cum probability	IEI	IEI						Amp	Amp
	Unlabeled-GC	Labeled GC						Unlabeled-GC	Labeled GC
0.003846	0.1296	0.02						3.02377	7.85129
0.007692	0.1428	0.0351						3.96259	8.27806
0.011538	0.1436	0.0417						4.12497	8.96285
0.015385	0.1676	0.0495						5.7938	9.18902
0.019231	0.1924	0.0527						6.2091	9.31912
0.023077	0.2196	0.0571		Kolmogorov-Smirnov test (IEI)				6.75717	10.4085		Kolmogorov-Smirnov test (Amp)
0.026923	0.2292	0.0624		P value	<0.0001			7.04676	10.6235		P value	<0.0001
0.030769	0.2362	0.0627		Exact or approximate P value?	Approximate			7.20665	10.9748		Exact or approximate P value?	Approximate
0.034615	0.3363	0.0628		P value summary	****			7.83624	11.013		P value summary	****
0.038462	0.355	0.073		Significantly different (P < 0.05)?	Yes			8.00744	11.1441		Significantly different (P < 0.05)?	Yes
0.042308	0.381	0.0867		Kolmogorov-Smirnov D	0.3346			8.03131	11.207		Kolmogorov-Smirnov D	0.2615
0.046154	0.3835	0.0964						8.04383	11.4276
0.05	0.4003	0.0983			Unlabeled-GC	Labeled GC		8.08596	11.4779			Unlabeled-GC	Labeled GC
0.053846	0.4429	0.0984		Number of values	260	260		8.12923	12.1331		Number of values	260	260
0.057692	0.445	0.1168						8.13621	12.1854
0.061538	0.4831	0.1253		Minimum	0.1296	0.02		8.31206	12.2373		Minimum	-43.52	-55.97
0.065385	0.5076	0.1512		25% Percentile	2.645	0.7425		8.41734	12.465		25% Percentile	-21.33	-25.18
0.069231	0.5172	0.1545		Median	5.869	2.138		8.63273	12.5502		Median	-16.69	-20.36
0.073077	0.5827	0.1683		75% Percentile	12.58	4.455		8.8947	12.6873		75% Percentile	-12.51	-16.4
0.076923	0.5888	0.1728		Maximum	51.05	24.32		8.93274	12.6921		Maximum	-3.024	-7.851
0.080769	0.6664	0.2111						8.97681	12.758
0.084615	0.7653	0.2327		Mean	9.316	3.737		8.99232	12.7652		Mean	-17.47	-21.48
0.088462	0.7797	0.2387		Std. Deviation	9.882	4.487		9.43937	12.7691		Std. Deviation	6.818	7.246
0.092308	0.7825	0.24		Std. Error of Mean	0.6129	0.2783		9.49475	13.1392		Std. Error of Mean	0.4229	0.4494
0.096154	0.799	0.2466						9.50417	13.2477
0.1	0.8562	0.2527		Lower 95% CI	8.109	3.189		9.53104	13.2733		Lower 95% CI	-18.31	-22.37
0.103846	0.9129	0.2546		Upper 95% CI	10.52	4.285		9.53679	13.3743		Upper 95% CI	-16.64	-20.6
0.107692	0.9379	0.2832						9.55446	13.556
0.111538	0.9547	0.2838						9.692	13.8122
0.115385	0.9813	0.2874						9.74173	13.9224
0.119231	1.0181	0.2925						9.77054	14.1657
0.123077	1.0494	0.3111						9.8701	14.1701
0.126923	1.109	0.3203						9.87253	14.3657
0.130769	1.1576	0.3605						9.87536	14.4504
0.134615	1.1583	0.3848						9.92592	14.4696
0.138462	1.2087	0.3851						9.98274	14.5678
0.142308	1.2233	0.3912						10.2325	14.5789
0.146154	1.3092	0.3987						10.426	14.596
0.15	1.3573	0.434						10.4438	14.9118
0.153846	1.3936	0.4441						10.465	14.9425
0.157692	1.3987	0.4644						10.6013	15.0003
0.161538	1.4738	0.4662						10.6538	15.0024
0.165385	1.4989	0.4737						10.7323	15.0621
0.169231	1.5378	0.4802						10.8231	15.1106
0.173077	1.5754	0.4845						10.8644	15.2411
0.176923	1.6937	0.4939						10.9867	15.4282
0.180769	1.7004	0.5334						11.1401	15.4357
0.184615	1.7497	0.5341						11.2023	15.5259
0.188462	1.7773	0.5368						11.2262	15.5418
0.192308	1.8019	0.5481						11.2462	15.5436
0.196154	1.8228	0.5509						11.3862	15.5818
0.2	1.8536	0.5594						11.5102	15.5918
0.203846	1.8832	0.5757						11.6456	15.6141
0.207692	1.9816	0.5767						12.0458	15.6518
0.211538	2.0304	0.6036						12.0559	15.6761
0.215385	2.2068	0.6093						12.1547	15.707
0.219231	2.2257	0.6518						12.2031	15.7131
0.223077	2.2286	0.6644						12.3024	15.7295
0.226923	2.2307	0.6703						12.3479	15.7602
0.230769	2.2745	0.6758						12.3558	15.824
0.234615	2.4486	0.6854						12.3887	16.0391
0.238462	2.4522	0.6864						12.414	16.0501
0.242308	2.4571	0.6872						12.418	16.1062
0.246154	2.4702	0.7228						12.5058	16.3604
0.25	2.6194	0.7339						12.5066	16.3919
0.253846	2.7204	0.7683						12.5203	16.4307
0.257692	2.7542	0.7695						12.547	16.4485
0.261538	2.7632	0.7749						12.6242	16.4886
0.265385	2.7819	0.8255						12.6855	16.577
0.269231	2.8359	0.8307						12.6879	16.7251
0.273077	2.8422	0.8457						12.7016	16.7956
0.276923	2.8748	0.9002						12.7526	16.8509
0.280769	2.888	0.911						12.846	16.8528
0.284615	2.9063	0.9205						12.9685	16.9016
0.288462	2.9517	0.938						13.0774	16.9363
0.292308	2.9775	1.0001						13.0919	16.9446
0.296154	3.0134	1.0165						13.1692	17.1369
0.3	3.1287	1.0597						13.4172	17.1803
0.303846	3.1327	1.0865						13.4662	17.2315
0.307692	3.1723	1.0942						13.6126	17.2324
0.311538	3.176	1.15						13.7298	17.244
0.315385	3.1958	1.1859						13.7592	17.2684
0.319231	3.2095	1.1902						13.761	17.4165
0.323077	3.2543	1.1993						13.9815	17.5575
0.326923	3.3151	1.2279						14.0031	17.7259
0.330769	3.3952	1.2319						14.0607	17.7374
0.334615	3.4538	1.2395						14.093	17.7772
0.338462	3.4727	1.2442						14.1327	17.8808
0.342308	3.5002	1.2656						14.1549	18.0533
0.346154	3.5076	1.2768						14.1863	18.1117
0.35	3.5428	1.2797						14.2425	18.1734
0.353846	3.5598	1.2811						14.2933	18.1871
0.357692	3.5661	1.2883						14.428	18.2169
0.361538	3.5782	1.3009						14.4532	18.2231
0.365385	3.5819	1.3147						14.4849	18.3553
0.369231	3.5885	1.3235						14.5082	18.4226
0.373077	3.6795	1.3704						14.5742	18.4751
0.376923	3.8391	1.3798						14.5784	18.5758
0.380769	3.9691	1.3843						14.7078	18.5771
0.384615	4.0089	1.3887						14.7112	18.5976
0.388462	4.0573	1.4168						14.7393	18.6824
0.392308	4.0826	1.4194						14.765	18.8834
0.396154	4.103	1.4481						14.8317	18.9478
0.4	4.1224	1.4754						15.0812	19.0657
0.403846	4.1289	1.4943						15.1825	19.1041
0.407692	4.2237	1.4956						15.2654	19.1258
0.411538	4.238	1.506						15.2946	19.1335
0.415385	4.2547	1.5179						15.3247	19.1551
0.419231	4.2753	1.5623						15.3653	19.1555
0.423077	4.2947	1.5696						15.4037	19.2209
0.426923	4.363	1.6141						15.4168	19.2467
0.430769	4.3714	1.6451						15.4212	19.4625
0.434615	4.5087	1.6473						15.4583	19.4706
0.438462	4.5711	1.6587						15.4785	19.4996
0.442308	4.581	1.6936						15.5188	19.5803
0.446154	4.8231	1.7058						15.592	19.6225
0.45	4.9795	1.7297						15.6365	19.6308
0.453846	5.1119	1.7378						15.6849	19.663
0.457692	5.1353	1.8296						15.7207	19.7893
0.461538	5.2264	1.876						15.9617	19.815
0.465385	5.3026	1.9104						16.0071	19.8464
0.469231	5.3538	1.9191						16.0507	19.8732
0.473077	5.4036	1.9212						16.0597	19.9495
0.476923	5.4458	1.9477						16.0702	20.0104
0.480769	5.4725	1.9803						16.2791	20.0341
0.484615	5.4947	1.9823						16.4864	20.0378
0.488462	5.6101	1.9957						16.4898	20.0806
0.492308	5.6462	2.0138						16.5525	20.2289
0.496154	5.6515	2.0593						16.6145	20.2643
0.5	5.7738	2.1209						16.6215	20.3147
0.503846	5.9651	2.1555						16.7524	20.4021
0.507692	5.9654	2.1987						16.7654	20.5244
0.511538	5.9737	2.2729						16.9394	20.527
0.515385	5.9917	2.3353						17.1085	20.6192
0.519231	6.1107	2.409						17.1614	20.6749
0.523077	6.185	2.4484						17.1748	20.7088
0.526923	6.2487	2.4558						17.1843	20.8225
0.530769	6.252	2.4669						17.369	20.9047
0.534615	6.3284	2.5125						17.4385	20.9866
0.538462	6.3711	2.5453						17.5323	21.1916
0.542308	6.4218	2.5923						17.6191	21.2798
0.546154	6.6646	2.6019						17.694	21.3066
0.55	6.7814	2.6052						17.7293	21.3757
0.553846	6.8646	2.6289						17.7367	21.3817
0.557692	7.0173	2.6319						17.7583	21.4275
0.561538	7.1231	2.6431						17.9488	21.4464
0.565385	7.1686	2.6715						18.1489	21.6597
0.569231	7.2384	2.6944						18.3873	21.6615
0.573077	7.2882	2.7108						18.5256	21.7241
0.576923	7.4655	2.7116						18.556	21.7376
0.580769	7.7032	2.7489						18.5815	21.7632
0.584615	7.9711	2.8162						18.5915	21.9808
0.588462	7.9758	2.8999						18.5915	22.028
0.592308	8.071	2.9023						18.6691	22.1007
0.596154	8.0862	2.9044						18.7108	22.2062
0.6	8.1421	2.9234						18.7588	22.3223
0.603846	8.1903	2.9386						18.8593	22.3282
0.607692	8.4739	2.9707						19.0747	22.4276
0.611538	8.6999	3.0219						19.1233	22.4837
0.615385	8.7097	3.0248						19.1979	22.492
0.619231	8.7188	3.0421						19.2698	22.5285
0.623077	8.7875	3.053						19.2954	22.6027
0.626923	8.9227	3.0669						19.3104	22.6647
0.630769	9.0844	3.0766						19.3631	22.7601
0.634615	9.1206	3.1327						19.4643	22.8262
0.638462	9.1763	3.1998						19.5218	22.9872
0.642308	9.1847	3.2142						19.6214	23.0888
0.646154	9.2359	3.2689						19.8468	23.2431
0.65	9.5183	3.3475						19.8482	23.25
0.653846	9.6853	3.4769						19.8572	23.2752
0.657692	9.7439	3.5618						19.9126	23.3117
0.661538	9.7708	3.6017						19.924	23.3231
0.665385	9.8067	3.6705						19.988	23.4596
0.669231	9.8781	3.6822						20.1109	23.4741
0.673077	9.9834	3.6951						20.1498	23.7684
0.676923	10.0404	3.7159						20.1529	23.8379
0.680769	10.1779	3.7299						20.2097	23.8475
0.684615	10.1954	3.7772						20.2418	23.9962
0.688462	10.4992	3.8611						20.2514	24.0664
0.692308	10.5727	3.8732						20.4431	24.1022
0.696154	10.621	3.8973						20.4854	24.1419
0.7	10.6493	3.9247						20.5524	24.1633
0.703846	10.7215	3.9961						20.7185	24.1682
0.707692	11.072	4.0245						20.7759	24.176
0.711538	11.3662	4.0315						20.9197	24.2077
0.715385	11.4068	4.17						21.0724	24.2626
0.719231	11.4879	4.1717						21.1158	24.3928
0.723077	11.7851	4.1859						21.1214	24.5334
0.726923	11.9437	4.1988						21.1336	24.5886
0.730769	12.0483	4.2229						21.1367	24.6688
0.734615	12.1028	4.2287						21.1432	24.7174
0.738462	12.1052	4.3051						21.2109	24.7229
0.742308	12.4045	4.3677						21.271	24.7348
0.746154	12.483	4.387						21.2891	24.8904
0.75	12.5591	4.3993						21.3299	25.0849
0.753846	12.5833	4.4734						21.3363	25.2132
0.757692	13.0498	4.5354						21.3875	25.3258
0.761538	13.0832	4.6085						21.4639	25.4367
0.765385	13.5677	4.9082						21.4645	25.493
0.769231	13.6787	4.9397						21.5101	25.4982
0.773077	13.7192	4.9546						21.6844	25.5653
0.776923	13.9738	4.9894						21.728	25.7272
0.780769	14.1501	5.0154						21.7429	25.7541
0.784615	14.4791	5.0971						21.9624	25.8065
0.788462	14.5596	5.2287						21.9744	25.9394
0.792308	14.6829	5.5073						22.0959	26.1089
0.796154	14.8854	5.5588						22.1114	26.2267
0.8	14.9838	5.6639						22.1569	26.356
0.803846	15.0261	5.6923						22.2511	26.3899
0.807692	15.1468	5.7345						22.3677	26.4163
0.811538	15.4518	5.8087						22.63	26.4432
0.815385	16.059	5.8499						22.7267	26.5054
0.819231	16.1365	5.9521						22.7337	26.6857
0.823077	16.4365	6.1883						23.0314	26.943
0.826923	16.4773	6.353						23.1202	27.1937
0.830769	16.5251	6.5434						23.276	27.2321
0.834615	16.5591	6.7908						23.3315	27.3044
0.838462	16.5751	6.9495						23.3746	27.3817
0.842308	16.7128	7.3408						23.444	27.4339
0.846154	17.3287	7.6219						23.462	27.5146
0.85	17.3957	7.8492						23.7652	27.6235
0.853846	17.7199	7.959						23.8493	27.6582
0.857692	17.7639	7.9942						23.9399	28.6796
0.861538	18.0768	8.0194						24.0026	28.8125
0.865385	18.3942	8.1393						24.0272	28.9054
0.869231	18.4491	8.2683						24.0418	29.0392
0.873077	19.3275	8.2742						24.08	29.2377
0.876923	19.5045	9.0076						24.1879	29.2732
0.880769	20.1538	9.228						24.3693	29.3234
0.884615	20.179	9.3372						24.4469	29.4773
0.888462	20.5451	9.4505						24.6052	29.5001
0.892308	20.5687	9.496						24.6229	29.6858
0.896154	21.6117	9.5227						24.6521	29.7054
0.9	21.8505	9.7715						24.9876	29.9397
0.903846	21.8653	9.7963						25.104	30.3247
0.907692	21.9834	10.3377						25.2887	30.4373
0.911538	22.5316	10.4541						25.39	30.5977
0.915385	23.6928	11.0496						26.6969	31.0687
0.919231	24.9935	11.1175						26.7496	31.3819
0.923077	25.3531	11.3773						27.0928	31.3951
0.926923	25.6235	11.4473						27.2021	31.5097
0.930769	27.5767	12.211						27.7116	31.9126
0.934615	27.5851	12.45						27.772	32.3566
0.938462	29.3282	12.7125						27.8728	32.4956
0.942308	30.7376	12.7197						29.4962	32.9591
0.946154	30.7438	13.0646						29.5521	33.3744
0.95	30.8467	13.8529						30.5776	35.7336
0.953846	31.628	13.8975						31.0984	35.8
0.957692	32.4143	13.9556						31.7186	35.9439
0.961538	33.5225	14.0704						31.9029	37.2364
0.965385	34.0083	14.2615						31.961	37.8094
0.969231	34.3449	14.2743						32.7095	38.0459
0.973077	34.359	14.3282						33.2458	38.2002
0.976923	38.4224	14.5744						33.3314	40.4814
0.980769	41.5105	17.4522						33.6213	42.1856
0.984615	44.5578	19.509						33.9679	42.8453
0.988462	45.8576	21.1631						35.5379	42.8976
0.992308	45.6547	23.7069						41.5791	44.8178
0.996154	48.7634	23.9876						42.7439	46.4542
1	51.0458	24.3166						43.5228	55.9685

## Sheet: SGC labeled-unlabeled
Cum probability	IEI	IEI								Amp	Amp
	Unlabeled-SGC	Labeled-SGC								Unlabeled-SGC	Labeled-SGC
0.001996	0.0138	0.0108								2.77851	4.09057
0.003992	0.0168	0.0168								4.09057	5.84102
0.005988	0.0175	0.0169								5.31875	6.16121
0.007984	0.0179	0.0222								5.90083	6.45645
0.00998	0.0199	0.0269								6.45645	6.74767
0.011976	0.0314	0.0337		Kolmogorov-Smirnov test (IEI)						6.70879	7.63244		Kolmogorov-Smirnov test (Amp)
0.013972	0.0335	0.0372		P value	<0.0001					7.20661	7.6655		P value	<0.0001
0.015968	0.0372	0.0403		Exact or approximate P value?	Approximate					7.3373	7.74053		Exact or approximate P value?	Approximate
0.017964	0.0443	0.0433		P value summary	****					7.53841	8.50985		P value summary	****
0.01996	0.0496	0.0539		Significantly different (P < 0.05)?	Yes					7.6655	8.55413		Significantly different (P < 0.05)?	Yes
0.021956	0.0666	0.0552		Kolmogorov-Smirnov D	0.1417					7.68024	8.6318		Kolmogorov-Smirnov D	0.2954
0.023952	0.0668	0.0575								7.7973	8.77032
0.025948	0.0708	0.0749			Unlabeled-SGC	Labeled-SGC				7.91617	9.2854			Unlabeled-SGC	Labeled-SGC
0.027944	0.0749	0.0761		Number of values	501	501				8.06862	9.32947		Number of values	501	501
0.02994	0.0773	0.0777								8.34253	9.4071
0.031936	0.0835	0.0814		Minimum	0.0138	0.0108				8.39559	9.42517		Minimum	-55.35	-94.37
0.033932	0.0861	0.0841		25% Percentile	0.8199	0.5261				8.40182	9.62248		25% Percentile	-18.87	-23.82
0.035928	0.1	0.0891		Median	2	1.3				8.45989	9.62614		Median	-15	-19.36
0.037924	0.1007	0.0902		75% Percentile	3.924	3.163				8.47283	9.70862		75% Percentile	-11.79	-15.18
0.03992	0.1167	0.0952		Maximum	34.33	18.27				8.55413	10.0193		Maximum	-2.779	-4.091
0.041916	0.1208	0.1007								8.65178	10.2736
0.043912	0.1229	0.1074		Mean	3.304	2.186				8.77032	10.3202		Mean	-16.2	-20.57
0.045908	0.1247	0.108		Std. Deviation	4.122	2.423				8.78999	10.3309		Std. Deviation	6.392	8.594
0.047904	0.1269	0.1088		Std. Error of Mean	0.1842	0.1082				8.92543	10.3366		Std. Error of Mean	0.2856	0.384
0.0499	0.131	0.1132								8.989	10.3427
0.051896	0.1336	0.1165		Lower 95% CI	2.942	1.974				9.12353	10.4513		Lower 95% CI	-16.76	-21.32
0.053892	0.1362	0.1167		Upper 95% CI	3.666	2.399				9.14588	10.5632		Upper 95% CI	-15.64	-19.81
0.055888	0.1466	0.1168								9.27047	10.5724
0.057884	0.1479	0.1169								9.32325	10.657
0.05988	0.1484	0.1229								9.32947	10.6644
0.061876	0.15	0.1246								9.40358	10.6699
0.063872	0.1545	0.1292								9.41575	10.9981
0.065868	0.157	0.1362								9.48275	11.0576
0.067864	0.1611	0.145								9.48836	11.0733
0.06986	0.1683	0.1462								9.61963	11.1062
0.071856	0.1737	0.1606								9.62248	11.1601
0.073852	0.1742	0.1615								9.62614	11.2224
0.075848	0.1783	0.162								9.6741	11.278
0.077844	0.1833	0.1623								9.68898	11.2898
0.07984	0.1891	0.163								9.70862	11.3336
0.081836	0.1909	0.163								9.80849	11.3548
0.083832	0.1957	0.1672								9.9299	11.3949
0.085828	0.2042	0.1713								9.96223	11.4182
0.087824	0.2111	0.1806								9.99239	11.4908
0.08982	0.2246	0.1873								10.0049	11.5635
0.091816	0.2347	0.1882								10.025	11.5661
0.093812	0.2348	0.1883								10.1807	11.6428
0.095808	0.2405	0.1899								10.2106	11.7629
0.097804	0.2474	0.1909								10.2151	11.868
0.0998	0.2488	0.1918								10.262	11.8731
0.101796	0.249	0.1999								10.2658	11.8792
0.103792	0.2565	0.2006								10.2736	11.9658
0.105788	0.2776	0.2018								10.2764	12.0301
0.107784	0.2782	0.2057								10.282	12.0589
0.10978	0.2784	0.2078								10.2881	12.0949
0.111776	0.2828	0.217								10.3186	12.1104
0.113772	0.2897	0.229								10.3309	12.1528
0.115768	0.2925	0.2348								10.3313	12.1962
0.117764	0.2963	0.2353								10.3366	12.2065
0.11976	0.2988	0.2417								10.3427	12.2962
0.121756	0.314	0.2474								10.4069	12.3127
0.123752	0.3167	0.2488								10.4408	12.4148
0.125749	0.3194	0.2514								10.4513	12.6854
0.127745	0.3196	0.2557								10.4588	12.7569
0.129741	0.3211	0.2567								10.4593	12.78
0.131737	0.3269	0.2626								10.4782	12.7927
0.133733	0.3278	0.2628								10.5158	12.7936
0.135729	0.3386	0.2668								10.5462	12.8439
0.137725	0.3496	0.2742								10.5713	12.8839
0.139721	0.3532	0.2745								10.5724	12.9096
0.141717	0.3575	0.2804								10.6395	12.9409
0.143713	0.3621	0.2828								10.6397	12.9664
0.145709	0.367	0.2869								10.6415	12.9911
0.147705	0.3873	0.2891								10.657	13.0028
0.149701	0.389	0.2897								10.6644	13.07
0.151697	0.3951	0.309								10.6857	13.0845
0.153693	0.4166	0.3123								10.6944	13.1023
0.155689	0.4173	0.3133								10.7536	13.1729
0.157685	0.4288	0.314								10.7552	13.2226
0.159681	0.4361	0.3158								10.7673	13.2281
0.161677	0.4364	0.3168								10.7769	13.2638
0.163673	0.4444	0.3189								10.7844	13.2872
0.165669	0.4446	0.3248								10.8077	13.3218
0.167665	0.4452	0.3269								10.816	13.3912
0.169661	0.446	0.3374								10.8682	13.4246
0.171657	0.4539	0.3385								10.9335	13.4605
0.173653	0.4679	0.3411								10.9541	13.4639
0.175649	0.4685	0.3449								10.9587	13.4733
0.177645	0.4726	0.345								10.9685	13.4896
0.179641	0.4737	0.3498								11.0441	13.5262
0.181637	0.474	0.3516								11.0601	13.565
0.183633	0.4802	0.3532								11.0775	13.6029
0.185629	0.5016	0.3547								11.1266	13.6759
0.187625	0.519	0.3644								11.1353	13.687
0.189621	0.5288	0.3669								11.1581	13.6924
0.191617	0.5416	0.367								11.1591	13.8518
0.193613	0.5454	0.3704								11.1937	13.8627
0.195609	0.5498	0.3721								11.2224	13.8764
0.197605	0.5849	0.3781								11.2368	13.9711
0.199601	0.5852	0.383								11.239	14.0154
0.201597	0.6411	0.3886								11.2851	14.1524
0.203593	0.647	0.3933								11.2898	14.1832
0.205589	0.6562	0.3949								11.2982	14.1995
0.207585	0.6672	0.4005								11.304	14.2
0.209581	0.6694	0.4142								11.3336	14.2242
0.211577	0.6803	0.4173								11.3548	14.2523
0.213573	0.6838	0.42								11.3817	14.385
0.215569	0.6932	0.4288								11.3876	14.4264
0.217565	0.6974	0.4304								11.4214	14.4309
0.219561	0.699	0.437								11.4473	14.5822
0.221557	0.7054	0.4414								11.4673	14.7392
0.223553	0.7119	0.4443								11.4738	14.7445
0.225549	0.7165	0.4444								11.5308	14.7467
0.227545	0.7327	0.446								11.5497	14.7744
0.229541	0.7505	0.4556								11.5513	14.864
0.231537	0.7557	0.457								11.5661	14.8748
0.233533	0.7695	0.4707								11.5841	14.9029
0.235529	0.7831	0.472								11.6198	14.9467
0.237525	0.7863	0.476								11.639	15.0462
0.239521	0.7875	0.4886								11.6933	15.0504
0.241517	0.7929	0.4957								11.7151	15.0744
0.243513	0.8002	0.5016								11.7317	15.0928
0.245509	0.8142	0.5041								11.7556	15.1236
0.247505	0.8181	0.5205								11.7733	15.1415
0.249501	0.8192	0.526								11.7739	15.1771
0.251497	0.8205	0.5262								11.8013	15.1782
0.253493	0.8224	0.5283								11.8037	15.1978
0.255489	0.8225	0.5288								11.868	15.2279
0.257485	0.8303	0.5416								11.8717	15.2729
0.259481	0.8328	0.5498								11.9078	15.3067
0.261477	0.8558	0.5565								11.9658	15.3231
0.263473	0.8626	0.5669								11.9771	15.378
0.265469	0.8726	0.5755								12.0273	15.3879
0.267465	0.8836	0.5849								12.0284	15.4273
0.269461	0.8993	0.5852								12.0347	15.4796
0.271457	0.9041	0.595								12.0527	15.4873
0.273453	0.911	0.6003								12.0589	15.5094
0.275449	0.918	0.6009								12.1104	15.5404
0.277445	0.9309	0.6018								12.1506	15.5679
0.279441	0.9331	0.6037								12.1647	15.5974
0.281437	0.94	0.6048								12.1675	15.6613
0.283433	0.9428	0.6172								12.1765	15.696
0.285429	0.9888	0.6177								12.1833	15.7022
0.287425	1.015	0.626								12.1846	15.7044
0.289421	1.0287	0.6303								12.1962	15.7145
0.291417	1.0291	0.6361								12.1973	15.7496
0.293413	1.0312	0.6457								12.2145	15.7891
0.295409	1.0451	0.6466								12.2298	15.802
0.297405	1.0487	0.6546								12.2447	15.8254
0.299401	1.0614	0.6667								12.2645	15.8698
0.301397	1.0622	0.6694								12.2962	15.8807
0.303393	1.0642	0.6697								12.3057	15.9256
0.305389	1.0694	0.6764								12.3828	16.0115
0.307385	1.0925	0.6764								12.384	16.0404
0.309381	1.0946	0.6787								12.387	16.0972
0.311377	1.1006	0.6788								12.4148	16.115
0.313373	1.1039	0.6803								12.4313	16.1305
0.315369	1.106	0.6838								12.4552	16.2102
0.317365	1.1061	0.6932								12.4865	16.2251
0.319361	1.107	0.6974								12.5377	16.2452
0.321357	1.107	0.699								12.5644	16.2547
0.323353	1.1298	0.6991								12.6854	16.2992
0.325349	1.1329	0.7082								12.6941	16.3022
0.327345	1.1332	0.7119								12.7078	16.3138
0.329341	1.1353	0.712								12.7823	16.3228
0.331337	1.1465	0.7142								12.8299	16.4024
0.333333	1.15	0.7286								12.8839	16.4285
0.335329	1.156	0.7334								12.8959	16.4324
0.337325	1.1678	0.7352								12.9176	16.4408
0.339321	1.1697	0.7448								12.9213	16.4501
0.341317	1.1757	0.7449								12.9215	16.4604
0.343313	1.181	0.7455								12.935	16.4768
0.345309	1.1964	0.7498								12.9807	16.4861
0.347305	1.1989	0.7505								13.0028	16.5817
0.349301	1.2153	0.7603								13.0311	16.6999
0.351297	1.2279	0.7685								13.07	16.7061
0.353293	1.2294	0.775								13.0845	16.7409
0.355289	1.2314	0.7855								13.0956	16.7491
0.357285	1.2353	0.7875								13.1023	16.7789
0.359281	1.2395	0.7916								13.1398	16.8419
0.361277	1.2424	0.7997								13.1889	16.8591
0.363273	1.2503	0.8186								13.2322	16.8893
0.365269	1.251	0.8354								13.2712	16.9363
0.367265	1.2624	0.8429								13.2824	16.9374
0.369261	1.2656	0.8584								13.3032	17.0283
0.371257	1.2659	0.8626								13.3084	17.0625
0.373253	1.2883	0.8664								13.3134	17.1417
0.37525	1.3114	0.8697								13.3218	17.1626
0.377246	1.3142	0.8726								13.3274	17.1636
0.379242	1.3198	0.8772								13.3646	17.2048
0.381238	1.3317	0.8797								13.4113	17.2189
0.383234	1.3364	0.885								13.4565	17.2473
0.38523	1.3523	0.8908								13.4639	17.268
0.387226	1.371	0.8938								13.4669	17.3011
0.389222	1.375	0.9052								13.4678	17.3038
0.391218	1.4048	0.9196								13.4733	17.54
0.393214	1.4102	0.9211								13.4953	17.6222
0.39521	1.4104	0.9331								13.5186	17.6797
0.397206	1.419	0.9389								13.5262	17.685
0.399202	1.4376	0.94								13.5366	17.7253
0.401198	1.4405	0.9418								13.5701	17.736
0.403194	1.443	0.942								13.6008	17.8656
0.40519	1.4501	0.9454								13.608	17.8846
0.407186	1.4661	0.9463								13.6232	17.943
0.409182	1.4754	0.9514								13.661	17.9707
0.411178	1.4864	0.9524								13.6759	18.0241
0.413174	1.4956	0.9526								13.7153	18.0458
0.41517	1.506	0.9541								13.7446	18.0804
0.417166	1.5269	0.9666								13.7469	18.1821
0.419162	1.5499	0.9756								13.7541	18.2344
0.421158	1.5553	0.9848								13.8031	18.2348
0.423154	1.5737	0.9857								13.822	18.2551
0.42515	1.5763	1.0026								13.8341	18.2603
0.427146	1.5863	1.0329								13.8518	18.2698
0.429142	1.5905	1.0479								13.8534	18.2768
0.431138	1.5947	1.0486								13.9711	18.2787
0.433134	1.6141	1.0487								13.9735	18.2851
0.43513	1.6255	1.0614								13.9902	18.3019
0.437126	1.6322	1.0619								14.0067	18.3333
0.439122	1.6331	1.0623								14.0132	18.3535
0.441118	1.6507	1.0696								14.015	18.3649
0.443114	1.6572	1.0718								14.0156	18.3714
0.44511	1.6759	1.0749								14.0158	18.389
0.447106	1.7106	1.0859								14.0175	18.4068
0.449102	1.723	1.0952								14.0232	18.4324
0.451098	1.7263	1.1011								14.1265	18.4346
0.453094	1.7277	1.1074								14.146	18.4421
0.45509	1.7508	1.1229								14.177	18.4973
0.457086	1.7595	1.1405								14.2523	18.5168
0.459082	1.7699	1.142								14.2581	18.5357
0.461078	1.784	1.151								14.2896	18.5472
0.463074	1.8074	1.1513								14.4006	18.5486
0.46507	1.8391	1.1637								14.4013	18.5836
0.467066	1.849	1.1678								14.444	18.6706
0.469062	1.85	1.1715								14.4695	18.7005
0.471058	1.8517	1.1961								14.4912	18.7704
0.473054	1.8525	1.1989								14.5066	18.8323
0.47505	1.8597	1.2001								14.5187	18.879
0.477046	1.8709	1.2111								14.5313	18.9038
0.479042	1.8722	1.2196								14.5907	18.9058
0.481038	1.8848	1.2397								14.6406	18.9859
0.483034	1.8967	1.2402								14.7445	19.0056
0.48503	1.9083	1.251								14.7467	19.0447
0.487026	1.9104	1.2541								14.7613	19.0607
0.489022	1.9333	1.2556								14.789	19.0619
0.491018	1.9411	1.2624								14.8619	19.1677
0.493014	1.9477	1.2641								14.8982	19.2198
0.49501	1.9573	1.2721								14.9233	19.2262
0.497006	1.9657	1.2919								14.9663	19.2516
0.499002	1.9957	1.296								14.9913	19.3618
0.500998	2.0002	1.2995								15.0034	19.3648
0.502994	2.0057	1.3198								15.0082	19.3892
0.50499	2.0593	1.3388								15.019	19.4481
0.506986	2.0696	1.36								15.0462	19.4851
0.508982	2.1334	1.3671								15.0504	19.4859
0.510978	2.1379	1.3877								15.0928	19.49
0.512974	2.1412	1.4102								15.1562	19.5949
0.51497	2.1455	1.4115								15.1782	19.6986
0.516966	2.1864	1.4123								15.1978	19.7535
0.518962	2.2325	1.4256								15.2101	19.7763
0.520958	2.2419	1.439								15.2108	19.7997
0.522954	2.257	1.4454								15.2161	19.813
0.52495	2.2803	1.447								15.2279	19.9333
0.526946	2.2858	1.4604								15.2416	19.9615
0.528942	2.2877	1.4607								15.2729	19.9767
0.530938	2.2943	1.4661								15.3067	20.0197
0.532934	2.3061	1.5011								15.3503	20.0458
0.53493	2.3172	1.5066								15.3543	20.0862
0.536926	2.3191	1.5141								15.3578	20.0975
0.538922	2.3308	1.5158								15.378	20.1417
0.540918	2.3318	1.5291								15.4523	20.154
0.542914	2.343	1.5433								15.5094	20.2019
0.54491	2.3552	1.5524								15.5143	20.222
0.546906	2.3678	1.5552								15.5159	20.2228
0.548902	2.3726	1.5635								15.539	20.2383
0.550898	2.409	1.5668								15.5529	20.2486
0.552894	2.4221	1.5693								15.5671	20.2667
0.55489	2.4293	1.5763								15.5675	20.329
0.556886	2.4332	1.5925								15.5679	20.3646
0.558882	2.4349	1.617								15.5964	20.3727
0.560878	2.4438	1.6223								15.6167	20.4016
0.562874	2.4482	1.6331								15.6534	20.4296
0.56487	2.4738	1.639								15.6606	20.4559
0.566866	2.4836	1.6513								15.6613	20.4581
0.568862	2.5152	1.6811								15.7139	20.534
0.570858	2.5163	1.6916								15.7257	20.5735
0.572854	2.5308	1.723								15.7401	20.6248
0.57485	2.5664	1.7341								15.7496	20.7423
0.576846	2.6258	1.7509								15.8807	20.7442
0.578842	2.6319	1.7528								15.9902	20.8525
0.580838	2.6373	1.7595								16.0115	20.9311
0.582834	2.6438	1.7857								16.0171	20.9329
0.58483	2.6505	1.7887								16.0365	20.9448
0.586826	2.6654	1.8506								16.0404	20.9729
0.588822	2.6896	1.8517								16.0716	20.9912
0.590818	2.7207	1.8525								16.139	20.9995
0.592814	2.7317	1.8567								16.1404	21.0852
0.59481	2.7489	1.8709								16.1841	21.111
0.596806	2.7564	1.8752								16.2102	21.1491
0.598802	2.7645	1.8808								16.2493	21.1952
0.600798	2.7661	1.8949								16.2547	21.201
0.602794	2.776	1.9031								16.3022	21.2322
0.60479	2.7845	1.9113								16.3382	21.2936
0.606786	2.8079	1.9177								16.3659	21.3227
0.608782	2.8221	1.9529								16.4308	21.4331
0.610778	2.8423	1.9786								16.4324	21.453
0.612774	2.8532	1.9984								16.4501	21.4877
0.61477	2.8776	2.0002								16.4604	21.5208
0.616766	2.8785	2.0162								16.4768	21.5598
0.618762	2.8792	2.0455								16.4861	21.6004
0.620758	2.8855	2.0503								16.5685	21.6047
0.622754	2.8882	2.068								16.5816	21.6252
0.62475	2.9023	2.0696								16.5873	21.7233
0.626747	2.9048	2.0724								16.6208	21.7509
0.628743	2.9199	2.0885								16.635	21.8288
0.630739	2.9307	2.0964								16.6883	21.9046
0.632735	2.9716	2.1111								16.699	21.9121
0.634731	3.0063	2.1386								16.6999	21.926
0.636727	3.015	2.1521								16.7788	21.9648
0.638723	3.0333	2.1551								16.7968	21.9721
0.640719	3.0745	2.1814								16.832	21.9874
0.642715	3.0788	2.2034								16.8617	22.006
0.644711	3.0794	2.2419								16.8893	22.0408
0.646707	3.0957	2.2563								16.9094	22.0858
0.648703	3.1005	2.2704								16.9274	22.0957
0.650699	3.1223	2.2846								16.9915	22.105
0.652695	3.1564	2.3061								17.0054	22.1063
0.654691	3.157	2.313								17.0283	22.1448
0.656687	3.1818	2.3308								17.0402	22.1504
0.658683	3.1855	2.3319								17.0625	22.1717
0.660679	3.1887	2.3349								17.0631	22.1769
0.662675	3.1949	2.343								17.0876	22.1882
0.664671	3.2122	2.3645								17.1417	22.209
0.666667	3.2142	2.3681								17.3011	22.2457
0.668663	3.2238	2.3781								17.3046	22.2528
0.670659	3.2363	2.3912								17.3321	22.2711
0.672655	3.274	2.3913								17.392	22.2729
0.674651	3.2768	2.4083								17.4205	22.3024
0.676647	3.3426	2.409								17.4263	22.3094
0.678643	3.3509	2.4291								17.4691	22.3553
0.680639	3.3573	2.4293								17.4796	22.4201
0.682635	3.4259	2.4433								17.5514	22.4203
0.684631	3.4279	2.4615								17.6994	22.4223
0.686627	3.4367	2.4712								17.7014	22.4932
0.688623	3.4769	2.4738								17.7253	22.502
0.690619	3.4795	2.497								17.767	22.5715
0.692615	3.4859	2.5083								17.8343	22.6088
0.694611	3.5433	2.5163								17.8595	22.7216
0.696607	3.5515	2.5426								18.0121	22.725
0.698603	3.5682	2.5441								18.0241	22.7317
0.700599	3.5786	2.5591								18.0279	22.7351
0.702595	3.5814	2.5645								18.032	22.7718
0.704591	3.584	2.584								18.0806	22.773
0.706587	3.627	2.5849								18.0864	22.7748
0.708583	3.631	2.6018								18.1753	22.7974
0.710579	3.6439	2.7207								18.2044	22.8217
0.712575	3.6508	2.7317								18.2139	22.832
0.714571	3.6673	2.7981								18.2566	22.8941
0.716567	3.6705	2.8006								18.2698	22.8979
0.718563	3.6822	2.8079								18.2787	22.9766
0.720559	3.6843	2.817								18.3014	23.0005
0.722555	3.6994	2.8275								18.312	23.0436
0.724551	3.7034	2.8447								18.3157	23.1115
0.726547	3.7112	2.8592								18.3326	23.1562
0.728543	3.7366	2.8889								18.3466	23.2837
0.730539	3.7475	2.9042								18.3604	23.3112
0.732535	3.7625	2.907								18.3649	23.3143
0.734531	3.763	2.9199								18.4457	23.3661
0.736527	3.7682	2.9307								18.462	23.4492
0.738523	3.7923	2.9886								18.4624	23.4564
0.740519	3.8205	2.9976								18.4908	23.6268
0.742515	3.8431	3.0227								18.5461	23.6693
0.744511	3.8551	3.0617								18.6172	23.6975
0.746507	3.8941	3.0957								18.6972	23.7374
0.748503	3.9056	3.1186								18.8006	23.7832
0.750499	3.9224	3.1564								18.8273	23.8014
0.752495	3.9253	3.1691								18.9062	23.8351
0.754491	3.9519	3.171								18.9684	23.8946
0.756487	3.9961	3.1742								18.9963	23.9024
0.758483	4.0147	3.1889								19.0046	23.9156
0.760479	4.0207	3.1891								19.0275	24.0002
0.762475	4.0245	3.1949								19.1554	24.0535
0.764471	4.0465	3.2118								19.2262	24.0812
0.766467	4.0787	3.2339								19.2272	24.0846
0.768463	4.1442	3.2813								19.2377	24.2187
0.770459	4.17	3.2991								19.3618	24.2319
0.772455	4.2287	3.3208								19.3892	24.3696
0.774451	4.2722	3.3426								19.4068	24.3744
0.776447	4.2741	3.3855								19.4481	24.4001
0.778443	4.3259	3.3922								19.5704	24.4444
0.780439	4.3495	3.4178								19.5756	24.4485
0.782435	4.366	3.4187								19.6986	24.4507
0.784431	4.3993	3.4337								19.7535	24.4801
0.786427	4.4734	3.4572								19.7884	24.489
0.788423	4.4814	3.4635								19.846	24.4898
0.790419	4.5455	3.472								19.8602	24.5517
0.792415	4.7108	3.4795								19.8649	24.7089
0.794411	4.8011	3.4859								20.1171	24.8174
0.796407	4.8789	3.4982								20.2085	24.8603
0.798403	4.9415	3.501								20.2228	25.013
0.800399	4.9789	3.5515								20.2448	25.371
0.802395	5.0142	3.553								20.2512	25.3736
0.804391	5.0154	3.5786								20.3587	25.4682
0.806387	5.0229	3.6169								20.425	25.4832
0.808383	5.055	3.6323								20.4559	25.6812
0.810379	5.1874	3.6439								20.481	25.6933
0.812375	5.2044	3.6589								20.5617	25.8159
0.814371	5.2316	3.7034								20.6248	25.9116
0.816367	5.2368	3.7155								20.6255	26.1482
0.818363	5.3122	3.7173								20.6989	26.2061
0.820359	5.3157	3.7176								20.7848	26.2742
0.822355	5.3492	3.7366								20.8034	26.3134
0.824351	5.3505	3.7405								20.8341	26.4358
0.826347	5.3728	3.7438								20.8458	26.4382
0.828343	5.4541	3.8152								20.898	26.5471
0.830339	5.4599	3.8941								20.9448	26.6153
0.832335	5.4834	3.9056								20.9522	26.7344
0.834331	5.4925	3.9342								21.0123	26.762
0.836327	5.5073	4.0552								21.0128	27.0274
0.838323	5.5729	4.0878								21.0563	27.0541
0.840319	5.5989	4.102								21.1492	27.0753
0.842315	5.5999	4.1267								21.201	27.0822
0.844311	5.6362	4.1442								21.2322	27.0958
0.846307	5.6612	4.1741								21.3116	27.1769
0.848303	5.7062	4.3245								21.4066	27.1947
0.850299	5.7345	4.3517								21.5218	27.2602
0.852295	5.8087	4.4376								21.5224	27.4327
0.854291	5.8511	4.4683								21.6397	27.5082
0.856287	5.9451	4.4857								21.7495	27.5279
0.858283	6.1163	4.5203								21.9648	27.7819
0.860279	6.1729	4.5228								21.984	27.904
0.862275	6.2286	4.5323								22.0736	28.008
0.864271	6.305	4.5562								22.0851	28.0303
0.866267	6.3738	4.6378								22.2457	28.0795
0.868263	6.4397	4.6429								22.2711	28.1369
0.870259	6.4566	4.7157								22.3094	28.4746
0.872255	6.5486	4.7763								22.3356	28.5877
0.874251	6.6713	4.8283								22.4822	28.6086
0.876248	6.7078	4.8322								22.4913	28.7355
0.878244	6.7835	4.8789								22.4932	28.7445
0.88024	6.9113	4.9092								22.6643	28.7719
0.882236	6.9388	4.9789								22.7687	28.7928
0.884232	6.9686	5.0229								22.8256	28.7955
0.886228	7.0715	5.055								22.8308	28.8217
0.888224	7.2358	5.0624								22.8828	28.955
0.89022	7.2957	5.0679								23.0202	29.4608
0.892216	7.3347	5.0996								23.0801	29.527
0.894212	7.3408	5.128								23.1364	30.1368
0.896208	7.5077	5.1816								23.177	30.3153
0.898204	7.8332	5.2086								23.5052	30.3162
0.9002	7.8492	5.3122								24.1394	30.8145
0.902196	7.8772	5.3362								24.1674	30.8547
0.904192	7.8844	5.3492								24.3495	30.9292
0.906188	7.959	5.3866								24.3696	31.023
0.908184	8.0194	5.4165								24.4444	31.2623
0.91018	8.1257	5.4541								24.4871	31.3654
0.912176	8.145	5.4559								24.705	31.6286
0.914172	8.2674	5.5729								24.7481	31.7268
0.916168	8.2683	5.5896								24.8603	31.9062
0.918164	8.2827	5.5999								24.9771	32.0752
0.92016	8.3617	5.6362								25.09	32.1884
0.922156	8.9056	5.6556								25.7051	32.2293
0.924152	9.0529	5.8746								26.0865	32.2339
0.926148	9.1239	5.8877								26.1072	32.4804
0.928144	9.1628	6.0104								26.6816	32.5197
0.93014	9.2799	6.0714								26.7376	32.8424
0.932136	9.2924	6.2721								26.9741	33.0082
0.934132	9.2995	6.2917								27.2733	33.339
0.936128	9.4505	6.4397								27.4726	33.7537
0.938124	9.6868	6.506								27.4945	33.9502
0.94012	9.722	6.6823								27.515	34.009
0.942116	9.75	6.8009								27.5279	34.0124
0.944112	9.7963	6.8392								27.6099	34.2363
0.946108	10.2179	6.9113								27.6169	34.2892
0.948104	10.2621	6.9643								27.6405	34.2974
0.9501	10.7255	6.9686								27.7421	35.1842
0.952096	11.3773	7.0469								28.0487	35.2436
0.954092	11.4919	7.0477								28.058	35.2678
0.956088	12.0459	7.1163								28.0663	35.4376
0.958084	12.409	7.1466								28.4874	35.5143
0.96008	12.7125	7.3308								28.5369	36.1059
0.962076	13.0646	7.3408								29.0805	36.4935
0.964072	13.4345	7.4178								29.2912	36.5541
0.966068	13.5805	7.5073								29.3453	37.2381
0.968064	13.8975	7.5367								30.4121	37.5799
0.97006	13.9267	7.5412								30.8943	37.7212
0.972056	14.2388	7.8772								31.3716	37.8965
0.974052	14.9752	7.8844								32.7232	38.3552
0.976048	14.9856	8.0337								33.1444	41.5756
0.978044	15.0455	8.0476								33.6222	42.0393
0.98004	15.9533	8.1178								34.9566	42.1872
0.982036	17.4048	8.8353								36.5155	42.2237
0.984032	18.222	9.3191								37.0699	45.1063
0.986028	18.9123	9.9588								37.9235	46.9375
0.988024	21.1631	10.7868								38.1187	47.3712
0.99002	21.5446	11.2001								38.2077	48.6245
0.992016	23.1172	11.4065								40.2183	49.483
0.994012	23.7069	13.4566								41.5786	51.9306
0.996008	24.3166	15.0455								42.3907	52.3608
0.998004	24.8799	15.2363								45.3457	73.1579
1	34.3288	18.2714								55.3456	94.3749
