# Supplementary material for: Cellular and circuit features distinguish mouse dentate gyrus semilunar granule cells and granule cells activated during contextual memory formation
Source: eLife. 2025 Aug 27;13:RP101428. doi: 10.7554/eLife.101428 (PMC12387755; doi:10.7554/eLife.101428)
Supplement: Figure 6—figure supplement 1—source data 1. [file elife-101428-fig6-figsupp1-data1.xlsx]

## Sheet: Dovek_et_al_Supp_5_A_Counts
Counts (#)
95% CI LOW	MEAN	95% CI HIGH	95% CI LOW	MEAN	95% CI HIGH
L-L	L-L	L-L	L-U	L-U	L-U
363.169	439	514.831	335.856	411.688	487.519
EPSC Recording		Event Counts (#)
Session	Type	Cell 1	Cell 2
1	L-U	344	357
2	L-U	380	447
3	L-U	355	126
4	L-L	358	277
5	L-U	264	237
6	L-U	426	360
7	L-L	259	235
8	L-L	736	916
9	L-U	722	274
10	L-L	497	342
11	L-U	783	806
12	L-L	578	276
13	L-U	301	405
14	L-L	377	389
15	L-L	353	553

## Sheet: Dovek_et_al_Fig6_S1B_Durations
Durations (s)
95% CI LOW	MEAN	95% CI HIGH	95% CI LOW	MEAN	95% CI HIGH
L-L	L-L	L-L	L-U	L-U	L-U
427.323	498.286	569.249	325.537	396.5	467.463
Session	Type	Duration (s)
1	L-U	300
2	L-U	330
2	L-U	299
2	L-L	476
2	L-U	300
2	L-U	403
2	L-L	365
2	L-L	610
2	L-U	321
2	L-L	340
2	L-U	609
2	L-L	607
2	L-U	610
2	L-L	610
2	L-L	480

## Sheet: Dovek_et_al_Fig6_S1C_Rates
Rates (Hz)
95% CI LOW	MEAN	95% CI HIGH	95% CI LOW	MEAN	95% CI HIGH
L-L	L-L	L-L	L-U	L-U	L-U
0.740601	1.03275	0.886676	0.912749	1.2049	1.05882
EPSC Recording		Event Rate (Hz)
Session	Type	Cell 1	Cell 2
1	L-U	1.14667	1.19
2	L-U	1.15152	1.35455
2	L-U	1.18729	0.421405
2	L-L	0.752101	0.581933
2	L-U	0.88	0.79
2	L-U	1.05707	0.8933
2	L-L	0.709589	0.643836
2	L-L	1.20656	1.50164
2	L-U	2.24922	0.853583
2	L-L	1.46176	1.00588
2	L-U	1.28571	1.32348
2	L-L	0.952224	0.454695
2	L-U	0.493443	0.663934
2	L-L	0.618033	0.637705
2	L-L	0.735417	1.15208
