# Supplementary material for: Cellular and circuit features distinguish mouse dentate gyrus semilunar granule cells and granule cells activated during contextual memory formation
Source: eLife. 2025 Aug 27;13:RP101428. doi: 10.7554/eLife.101428 (PMC12387755; doi:10.7554/eLife.101428)
Supplement: Figure 6—figure supplement 2—source data 1. [file elife-101428-fig6-figsupp2-data1.xlsx]

## Sheet: Supp_6_A
-0.1	4.12701e-18
-0.09	0.0274204
-0.08	0.0548408
-0.07	0.0548408
-0.06	5.76009e-18
-0.05	0.0548408
-0.04	1.11377e-17
-0.03	0.109682
-0.02	0.0274204
-0.01	0.109682
0	0.219363
0.01	8.29322e-19
0.02	0.0822613
0.03	0.109682
0.04	0.0548408
0.05	2.76062e-18
0.06	0.0274204
0.07	-5.45308e-19
0.08	0.0822613
0.09	0.0822613
0.1	2.59873e-18

## Sheet: Supp_6_B
-0.1	0.0587157
-0.09	0.0733946
-0.08	0.0880735
-0.07	0.0660552
-0.06	0.0146789
-0.05	0.0587157
-0.04	0.0807341
-0.03	0.00733946
-0.02	0.0587157
-0.01	0.0660552
0	0.0587157
0.01	0.00733946
0.02	0.0587157
0.03	0.0880735
0.04	0.0440368
0.05	0.095413
0.06	0.0733946
0.07	0.095413
0.08	0.0293578
0.09	0.0807341
0.1	0.0440368

## Sheet: Supp_6_C
-0.1	0.0648289
-0.09	0.0810361
-0.08	0.0729325
-0.07	0.0243108
-0.06	0.0486217
-0.05	0.0405181
-0.04	0.0729325
-0.03	0.0405181
-0.02	0.0567253
-0.01	5.4178e-18
0	0.0567253
0.01	0.0243108
0.02	0.0729325
0.03	0.0729325
0.04	0.0486217
0.05	0.0648289
0.06	0.113451
0.07	0.129658
0.08	0.218797
0.09	0.0567253
0.1	4.1909e-18

## Sheet: Supp_6_D_1
-0.1	0.0461894
-0.09	0.0384912
-0.08	0.0230947
-0.07	0.13087
-0.06	0.0307929
-0.05	0.223249
-0.04	0.0615859
-0.03	0.146266
-0.02	0.00769823
-0.01	0.0538876
0	0.115473
0.01	0.0692841
0.02	0.0615859
0.03	0.0538876
0.04	0.0153965
0.05	0.0461894
0.06	0.0307929
0.07	0.0615859
0.08	0.0615859
0.09	0.0923788
0.1	0.0307929

## Sheet: Supp_6_D_2
-1000	0.0201248
-999	0.0207562
-998	0.0212153
-997	0.0214949
-996	0.0216061
-995	0.0215783
-994	0.0214532
-993	0.021283
-992	0.0211181
-991	0.021003
-990	0.0209698
-989	0.0210358
-988	0.0212005
-987	0.0214457
-986	0.0217349
-985	0.022022
-984	0.0222552
-983	0.0223835
-982	0.0223683
-981	0.0221841
-980	0.0218233
-979	0.0212963
-978	0.0206237
-977	0.0198332
-976	0.0189514
-975	0.0180003
-974	0.0169956
-973	0.0159475
-972	0.0148683
-971	0.0137747
-970	0.0126919
-969	0.0116536
-968	0.0107034
-967	0.00988848
-966	0.0092555
-965	0.00883995
-964	0.00866059
-963	0.00871423
-962	0.00897088
-961	0.00937912
-960	0.00987065
-959	0.0103699
-958	0.0108057
-957	0.0111216
-956	0.0112883
-955	0.0113054
-954	0.0112017
-953	0.0110305
-952	0.0108608
-951	0.0107654
-950	0.0108086
-949	0.0110358
-948	0.0114609
-947	0.012065
-946	0.0127943
-945	0.013569
-944	0.0142932
-943	0.01487
-942	0.0152199
-941	0.0152914
-940	0.0150712
-939	0.0145861
-938	0.0138975
-937	0.0130884
-936	0.0122471
-935	0.0114541
-934	0.0107701
-933	0.0102288
-932	0.0098354
-931	0.00957195
-930	0.00940352
-929	0.00928731
-928	0.00918157
-927	0.00905119
-926	0.00887223
-925	0.0086316
-924	0.00833171
-923	0.00798667
-922	0.00762108
-921	0.00727192
-920	0.00698407
-919	0.00680706
-918	0.00679289
-917	0.00699115
-916	0.00744439
-915	0.00817859
-914	0.00919775
-913	0.010479
-912	0.0119689
-911	0.0135866
-910	0.0152297
-909	0.0167874
-908	0.0181511
-907	0.0192297
-906	0.0199612
-905	0.0203216
-904	0.0203214
-903	0.0200062
-902	0.0194477
-901	0.018731
-900	0.0179475
-899	0.0171829
-898	0.016507
-897	0.015968
-896	0.015589
-895	0.0153687
-894	0.0152833
-893	0.0152922
-892	0.0153485
-891	0.0154066
-890	0.0154287
-889	0.0153908
-888	0.0152888
-887	0.0151331
-886	0.0149476
-885	0.014762
-884	0.0146096
-883	0.0145208
-882	0.0145197
-881	0.014624
-880	0.0148404
-879	0.0151671
-878	0.0155903
-877	0.0160849
-876	0.0166132
-875	0.0171301
-874	0.0175876
-873	0.0179416
-872	0.018157
-871	0.0182147
-870	0.0181176
-869	0.0178842
-868	0.017547
-867	0.0171472
-866	0.0167257
-865	0.01632
-864	0.0159578
-863	0.015655
-862	0.0154169
-861	0.0152392
-860	0.015108
-859	0.0150038
-858	0.0149044
-857	0.0147873
-856	0.0146369
-855	0.0144442
-854	0.0142125
-853	0.0139592
-852	0.0137176
-851	0.0135299
-850	0.0134457
-849	0.0135205
-848	0.0138067
-847	0.0143532
-846	0.0151961
-845	0.0163566
-844	0.0178356
-843	0.0196108
-842	0.0216323
-841	0.0238221
-840	0.0260788
-839	0.0282772
-838	0.0302787
-837	0.0319415
-836	0.0331314
-835	0.033743
-834	0.0337099
-833	0.0330158
-832	0.0317002
-831	0.0298588
-830	0.0276283
-829	0.0251681
-828	0.0226443
-827	0.0202072
-826	0.0179794
-825	0.0160432
-824	0.0144402
-823	0.0131755
-822	0.0122251
-821	0.0115486
-820	0.0110982
-819	0.0108313
-818	0.0107177
-817	0.0107423
-816	0.0109043
-815	0.0112121
-814	0.011677
-813	0.0123072
-812	0.013098
-811	0.0140277
-810	0.0150557
-809	0.0161242
-808	0.017159
-807	0.0180779
-806	0.0187989
-805	0.0192508
-804	0.019381
-803	0.0191617
-802	0.0185996
-801	0.0177283
-800	0.0166122
-799	0.0153342
-798	0.013988
-797	0.0126717
-796	0.0114758
-795	0.0104774
-794	0.0097342
-793	0.00928054
-792	0.00912715
-791	0.00926218
-790	0.0096544
-789	0.0102583
-788	0.0110225
-787	0.0118929
-786	0.012821
-785	0.0137673
-784	0.0147021
-783	0.0156078
-782	0.0164731
-781	0.0172962
-780	0.0180754
-779	0.0188108
-778	0.0195
-777	0.020137
-776	0.0207155
-775	0.0212266
-774	0.0216651
-773	0.0220278
-772	0.0223156
-771	0.0225337
-770	0.0226905
-769	0.0227957
-768	0.0228586
-767	0.0228922
-766	0.0229057
-765	0.0229085
-764	0.0229098
-763	0.0229148
-762	0.0229252
-761	0.0229392
-760	0.0229508
-759	0.0229505
-758	0.0229261
-757	0.0228679
-756	0.0227676
-755	0.0226236
-754	0.0224351
-753	0.022204
-752	0.0219312
-751	0.0216136
-750	0.0212439
-749	0.0208119
-748	0.0203053
-747	0.0197125
-746	0.0190289
-745	0.0182558
-744	0.0173999
-743	0.0164775
-742	0.0155117
-741	0.0145322
-740	0.0135751
-739	0.0126812
-738	0.0118954
-737	0.0112576
-736	0.0108013
-735	0.010546
-734	0.0104966
-733	0.01064
-732	0.0109467
-731	0.0113747
-730	0.0118742
-729	0.0123916
-728	0.0128763
-727	0.0132826
-726	0.0135722
-725	0.0137187
-724	0.0137114
-723	0.013552
-722	0.013258
-721	0.012865
-720	0.0124261
-719	0.0120104
-718	0.0116974
-717	0.0115767
-716	0.0117326
-715	0.0122381
-714	0.0131406
-713	0.0144526
-712	0.0161452
-711	0.0181458
-710	0.0203423
-709	0.0225952
-708	0.0247503
-707	0.0266607
-706	0.0282026
-705	0.0292888
-704	0.029874
-703	0.0299594
-702	0.0295817
-701	0.0288024
-700	0.0276964
-699	0.0263437
-698	0.0248253
-697	0.0232152
-696	0.0215874
-695	0.0200101
-694	0.0185494
-693	0.0172643
-692	0.0162051
-691	0.0154102
-690	0.0149015
-689	0.0146829
-688	0.0147401
-687	0.0150364
-686	0.0155176
-685	0.0161147
-684	0.0167502
-683	0.0173466
-682	0.0178383
-681	0.0181782
-680	0.0183475
-679	0.0183555
-678	0.018241
-677	0.018067
-676	0.0179085
-675	0.0178395
-674	0.0179189
-673	0.0181813
-672	0.0186268
-671	0.019222
-670	0.0199052
-669	0.0205963
-668	0.0212106
-667	0.0216758
-666	0.0219389
-665	0.021975
-664	0.0217884
-663	0.0214082
-662	0.0208819
-661	0.0202688
-660	0.0196314
-659	0.0190265
-658	0.018498
-657	0.0180753
-656	0.0177689
-655	0.0175739
-654	0.0174705
-653	0.0174303
-652	0.0174251
-651	0.0174321
-650	0.0174395
-649	0.017452
-648	0.017489
-647	0.0175824
-646	0.017771
-645	0.0180917
-644	0.01857
-643	0.019214
-642	0.0200088
-641	0.0209148
-640	0.0218683
-639	0.0227923
-638	0.0235987
-637	0.024199
-636	0.0245157
-635	0.0244912
-634	0.0240983
-633	0.0233458
-632	0.0222815
-631	0.0209891
-630	0.0195818
-629	0.018184
-628	0.0169181
-627	0.0158879
-626	0.0151656
-625	0.0147844
-624	0.014736
-623	0.0149736
-622	0.0154208
-621	0.0159825
-620	0.0165578
-619	0.0170513
-618	0.0173879
-617	0.017519
-616	0.0174286
-615	0.0171325
-614	0.0166719
-613	0.0161025
-612	0.0154827
-611	0.014865
-610	0.0142858
-609	0.0137643
-608	0.0133023
-607	0.012887
-606	0.0124978
-605	0.012111
-604	0.0117045
-603	0.0112598
-602	0.0107641
-601	0.0102115
-600	0.00960186
-599	0.00894406
-598	0.00825413
-597	0.0075569
-596	0.00688432
-595	0.00627637
-594	0.00577874
-593	0.00544213
-592	0.00531536
-591	0.00543935
-590	0.00584225
-589	0.00653306
-588	0.00749781
-587	0.00869562
-586	0.010062
-585	0.0115156
-584	0.0129663
-583	0.014329
-582	0.0155329
-581	0.0165322
-580	0.0173135
-579	0.0178887
-578	0.018297
-577	0.0185888
-576	0.0188174
-575	0.0190263
-574	0.0192441
-573	0.0194799
-572	0.0197285
-571	0.0199761
-570	0.0202066
-569	0.0204084
-568	0.0205789
-567	0.0207263
-566	0.0208617
-565	0.0209942
-564	0.0211243
-563	0.0212361
-562	0.0212999
-561	0.021274
-560	0.0211127
-559	0.0207819
-558	0.0202638
-557	0.0195707
-556	0.0187444
-555	0.0178525
-554	0.0169758
-553	0.0161984
-552	0.0155892
-551	0.0151913
-550	0.0150151
-549	0.0150374
-548	0.015205
-547	0.0154466
-546	0.0156841
-545	0.0158438
-544	0.0158695
-543	0.0157277
-542	0.0154096
-541	0.0149303
-540	0.0143242
-539	0.0136364
-538	0.0129168
-537	0.0122089
-536	0.0115463
-535	0.0109497
-534	0.0104273
-533	0.00997496
-532	0.00958191
-531	0.00923472
-530	0.00891871
-529	0.00862208
-528	0.00833833
-527	0.00806558
-526	0.0078102
-525	0.0075839
-524	0.00740265
-523	0.0072876
-522	0.00726052
-521	0.00734228
-520	0.00755042
-519	0.00789727
-518	0.00838701
-517	0.00901735
-516	0.00977608
-515	0.0106415
-514	0.0115827
-513	0.0125598
-512	0.0135268
-511	0.0144319
-510	0.0152245
-509	0.0158564
-508	0.0162851
-507	0.0164805
-506	0.0164268
-505	0.0161274
-504	0.0156027
-503	0.0148921
-502	0.0140519
-501	0.0131498
-500	0.0122593
-499	0.0114542
-498	0.0108011
-497	0.0103499
-496	0.0101294
-495	0.0101426
-494	0.010367
-493	0.0107574
-492	0.0112521
-491	0.0117841
-490	0.0122894
-489	0.0127176
-488	0.0130419
-487	0.0132558
-486	0.0133768
-485	0.0134431
-484	0.0135071
-483	0.0136256
-482	0.0138532
-481	0.0142341
-480	0.0147923
-479	0.0155303
-478	0.0164266
-477	0.0174413
-476	0.0185228
-475	0.0196151
-474	0.0206683
-473	0.0216413
-472	0.0225067
-471	0.0232471
-470	0.0238543
-469	0.0243261
-468	0.0246608
-467	0.0248639
-466	0.0249405
-465	0.0248952
-464	0.0247377
-463	0.024477
-462	0.0241223
-461	0.0236831
-460	0.0231696
-459	0.0225898
-458	0.0219527
-457	0.0212678
-456	0.0205452
-455	0.0197969
-454	0.0190354
-453	0.0182797
-452	0.0175486
-451	0.0168629
-450	0.0162409
-449	0.0156968
-448	0.0152377
-447	0.0148567
-446	0.0145369
-445	0.0142493
-444	0.0139546
-443	0.0136129
-442	0.0131876
-441	0.0126538
-440	0.0120032
-439	0.011248
-438	0.0104192
-437	0.00956351
-436	0.00873763
-435	0.00800223
-434	0.0074152
-433	0.00702311
-432	0.00686134
-431	0.00694747
-430	0.0072787
-429	0.00783261
-428	0.00856949
-427	0.00943858
-426	0.0103828
-425	0.0113488
-424	0.0122939
-423	0.0131897
-422	0.014026
-421	0.0148054
-420	0.0155381
-419	0.0162329
-418	0.0168909
-417	0.0175028
-416	0.0180479
-415	0.0184986
-414	0.0188285
-413	0.0190194
-412	0.0190649
-411	0.0189724
-410	0.0187624
-409	0.0184598
-408	0.0180893
-407	0.0176707
-406	0.0172182
-405	0.0167397
-404	0.0162402
-403	0.0157282
-402	0.0152175
-401	0.0147306
-400	0.0142959
-399	0.0139441
-398	0.0137018
-397	0.0135859
-396	0.0135997
-395	0.0137294
-394	0.0139456
-393	0.0142054
-392	0.0144603
-391	0.0146603
-390	0.0147612
-389	0.0147317
-388	0.0145546
-387	0.0142284
-386	0.0137669
-385	0.0131961
-384	0.0125493
-383	0.011861
-382	0.0111634
-381	0.0104822
-380	0.00983708
-379	0.00924038
-378	0.00869901
-377	0.00821684
-376	0.0077975
-375	0.00744434
-374	0.00716028
-373	0.00694853
-372	0.00680896
-371	0.00673754
-370	0.00672683
-369	0.00676534
-368	0.00684268
-367	0.00695123
-366	0.00708931
-365	0.00726327
-364	0.00748796
-363	0.00778202
-362	0.00816437
-361	0.00864938
-360	0.0092426
-359	0.00993815
-358	0.0107179
-357	0.0115518
-356	0.0124001
-355	0.0132181
-354	0.0139576
-353	0.0145719
-352	0.0150195
-351	0.0152708
-350	0.0153081
-349	0.0151323
-348	0.014759
-347	0.0142195
-346	0.0135558
-345	0.012816
-344	0.0120477
-343	0.0112951
-342	0.0105933
-341	0.00996559
-340	0.00942228
-339	0.00896381
-338	0.00858178
-337	0.00826378
-336	0.00799716
-335	0.00777224
-334	0.00758651
-333	0.00744208
-332	0.00734533
-331	0.00730152
-330	0.00731276
-329	0.00737278
-328	0.00746771
-327	0.00757485
-326	0.0076661
-325	0.00771353
-324	0.00769271
-323	0.00758722
-322	0.00739175
-321	0.00711336
-320	0.0067701
-319	0.00638576
-318	0.00598711
-317	0.005599
-316	0.00524098
-315	0.00492564
-314	0.00465753
-313	0.00443445
-312	0.00424936
-311	0.0040918
-310	0.00394859
-309	0.00380629
-308	0.00365285
-307	0.00347961
-306	0.00328393
-305	0.00306811
-304	0.00284338
-303	0.00262639
-302	0.00243875
-301	0.00230335
-300	0.00224129
-299	0.00227005
-298	0.0024013
-297	0.00263959
-296	0.0029829
-295	0.00342346
-294	0.00395031
-293	0.00455154
-292	0.00521607
-291	0.00593407
-290	0.00669875
-289	0.0075045
-288	0.00834359
-287	0.00920619
-286	0.0100776
-285	0.0109394
-284	0.0117688
-283	0.0125431
-282	0.0132399
-281	0.0138434
-280	0.0143458
-279	0.014748
-278	0.0150596
-277	0.0152965
-276	0.0154764
-275	0.0156147
-274	0.0157197
-273	0.0157901
-272	0.0158151
-271	0.0157791
-270	0.0156646
-269	0.0154578
-268	0.0151573
-267	0.0147721
-266	0.0143237
-265	0.0138418
-264	0.0133585
-263	0.0129009
-262	0.0124868
-261	0.0121193
-260	0.0117878
-259	0.0114711
-258	0.011142
-257	0.0107745
-256	0.0103525
-255	0.00987303
-254	0.00935073
-253	0.00881753
-252	0.00831728
-251	0.00790086
-250	0.007617
-249	0.00750415
-248	0.00758163
-247	0.00784772
-246	0.00827614
-245	0.00881868
-244	0.00941226
-243	0.00998638
-242	0.0104741
-241	0.0108207
-240	0.0109909
-239	0.010973
-238	0.0107796
-237	0.0104445
-236	0.0100145
-235	0.0095432
-234	0.00908193
-233	0.00867314
-232	0.00834568
-231	0.00811225
-230	0.00797168
-229	0.00791177
-228	0.00791389
-227	0.00795824
-226	0.00802854
-225	0.00811274
-224	0.0082044
-223	0.00830276
-222	0.00841132
-221	0.00853818
-220	0.00869514
-219	0.00889769
-218	0.0091634
-217	0.00950944
-216	0.00995142
-215	0.0104963
-214	0.0111381
-213	0.0118546
-212	0.0126052
-211	0.0133329
-210	0.0139709
-209	0.0144531
-208	0.0147255
-207	0.0147555
-206	0.0145404
-205	0.0141101
-204	0.0135187
-203	0.0128369
-202	0.0121384
-201	0.0114896
-200	0.0109378
-199	0.0105084
-198	0.0102051
-197	0.0100151
-196	0.00991809
-195	0.00989576
-194	0.00993971
-193	0.010057
-192	0.0102691
-191	0.0106067
-190	0.0110999
-189	0.0117653
-188	0.0125976
-187	0.0135635
-186	0.0146015
-185	0.0156293
-184	0.0165587
-183	0.0173077
-182	0.0178158
-181	0.0180514
-180	0.0180182
-179	0.0177471
-178	0.0172882
-177	0.0166979
-176	0.0160272
-175	0.0153142
-174	0.0145816
-173	0.0138366
-172	0.0130823
-171	0.0123237
-170	0.0115753
-169	0.0108714
-168	0.010262
-167	0.00981245
-166	0.00959353
-165	0.00967109
-164	0.010093
-163	0.0108791
-162	0.0120134
-161	0.0134421
-160	0.015075
-159	0.0167943
-158	0.018466
-157	0.0199528
-156	0.021129
-155	0.0218937
-154	0.02218
-153	0.0219649
-152	0.0212651
-151	0.0201382
-150	0.0186735
-149	0.016977
-148	0.0151632
-147	0.0133391
-146	0.0115969
-145	0.0100053
-144	0.00860997
-143	0.00743139
-142	0.00647073
-141	0.00571426
-140	0.00514041
-139	0.00472546
-138	0.00444743
-137	0.00428983
-136	0.00424122
-135	0.00429366
-134	0.00444082
-133	0.0046746
-132	0.00498477
-131	0.00535823
-130	0.00577852
-129	0.00623022
-128	0.00670085
-127	0.00718235
-126	0.00767436
-125	0.00818414
-124	0.00872584
-123	0.00931973
-122	0.00998575
-121	0.0107413
-120	0.011593
-119	0.0125344
-118	0.0135432
-117	0.0145817
-116	0.0156
-115	0.0165427
-114	0.0173566
-113	0.0179948
-112	0.0184258
-111	0.0186345
-110	0.0186273
-109	0.0184272
-108	0.0180721
-107	0.0176104
-106	0.0170915
-105	0.0165628
-104	0.016062
-103	0.0156137
-102	0.0152283
-101	0.0149016
-100	0.0146193
-99	0.014359
-98	0.0140975
-97	0.0138128
-96	0.0134921
-95	0.0131323
-94	0.0127423
-93	0.0123437
-92	0.0119685
-91	0.0116528
-90	0.0114325
-89	0.0113386
-88	0.0113919
-87	0.0116004
-86	0.0119604
-85	0.012456
-84	0.0130626
-83	0.0137506
-82	0.0144853
-81	0.0152295
-80	0.0159441
-79	0.0165898
-78	0.0171288
-77	0.0175298
-76	0.0177682
-75	0.0178327
-74	0.0177272
-73	0.0174692
-72	0.0170873
-71	0.016622
-70	0.0161178
-69	0.0156193
-68	0.0151675
-67	0.0147989
-66	0.0145433
-65	0.0144262
-64	0.0144666
-63	0.0146799
-62	0.015077
-61	0.0156635
-60	0.0164394
-59	0.017397
-58	0.0185191
-57	0.0197776
-56	0.0211342
-55	0.0225376
-54	0.0239247
-53	0.0252286
-52	0.0263785
-51	0.0273076
-50	0.0279586
-49	0.0282937
-48	0.0282964
-47	0.0279715
-46	0.0273469
-45	0.0264716
-44	0.0254148
-43	0.0242568
-42	0.0230886
-41	0.0219992
-40	0.0210669
-39	0.0203504
-38	0.0198783
-37	0.0196438
-36	0.0196059
-35	0.0196932
-34	0.0198143
-33	0.0198698
-32	0.0197707
-31	0.0194468
-30	0.0188592
-29	0.0180012
-28	0.0169012
-27	0.0156183
-26	0.01423
-25	0.012822
-24	0.0114789
-23	0.0102748
-22	0.00926572
-21	0.00849089
-20	0.00796945
-19	0.00770431
-18	0.00768591
-17	0.00789448
-16	0.00830274
-15	0.00888137
-14	0.00959898
-13	0.0104246
-12	0.0113292
-11	0.0122875
-10	0.0132801
-9	0.0142925
-8	0.0153134
-7	0.0163368
-6	0.0173558
-5	0.0183602
-4	0.0193319
-3	0.0202484
-2	0.0210777
-1	0.0217824
0	0.0223272
1	0.022682
2	0.0228278
3	0.0227627
4	0.0225023
5	0.0220761
6	0.0215263
7	0.020899
8	0.0202364
9	0.0195714
10	0.0189222
11	0.0182924
12	0.0176747
13	0.0170536
14	0.016417
15	0.0157609
16	0.0150923
17	0.0144288
18	0.0138024
19	0.0132494
20	0.0128046
21	0.0124946
22	0.0123334
23	0.0123161
24	0.0124201
25	0.012607
26	0.0128248
27	0.0130169
28	0.0131286
29	0.0131131
30	0.0129397
31	0.0125976
32	0.0120968
33	0.0114703
34	0.0107696
35	0.0100569
36	0.00940101
37	0.00886673
38	0.00850618
39	0.0083558
40	0.00843091
41	0.00872644
42	0.0092182
43	0.00986979
44	0.010633
45	0.0114556
46	0.0122856
47	0.0130727
48	0.0137725
49	0.0143497
50	0.0147791
51	0.01505
52	0.0151645
53	0.0151354
54	0.0149838
55	0.0147366
56	0.0144167
57	0.014041
58	0.0136177
59	0.0131473
60	0.0126287
61	0.0120639
62	0.0114645
63	0.0108543
64	0.0102752
65	0.00977705
66	0.00941375
67	0.00923292
68	0.00926671
69	0.00952598
70	0.00999568
71	0.0106367
72	0.0113949
73	0.0122084
74	0.0130171
75	0.0137727
76	0.0144467
77	0.0150289
78	0.0155273
79	0.0159623
80	0.0163591
81	0.0167425
82	0.0171319
83	0.0175369
84	0.0179541
85	0.0183713
86	0.0187635
87	0.0190986
88	0.0193385
89	0.0194425
90	0.0193774
91	0.0191166
92	0.0186461
93	0.0179697
94	0.0171094
95	0.0161036
96	0.0150039
97	0.0138757
98	0.0127874
99	0.0118044
100	0.0109854
101	0.010375
102	0.0100005
103	0.00987181
104	0.00998028
105	0.0103044
106	0.0108129
107	0.0114691
108	0.0122384
109	0.0130918
110	0.0140058
111	0.0149695
112	0.0159767
113	0.0170261
114	0.0181161
115	0.0192407
116	0.0203869
117	0.0215291
118	0.0226328
119	0.0236531
120	0.0245346
121	0.0252173
122	0.0256424
123	0.0257628
124	0.0255499
125	0.0249984
126	0.024135
127	0.023013
128	0.0217052
129	0.0202963
130	0.0188736
131	0.0175128
132	0.0162745
133	0.0151977
134	0.0143012
135	0.0135862
136	0.0130384
137	0.0126342
138	0.0123455
139	0.0121465
140	0.0120162
141	0.0119429
142	0.0119229
143	0.0119584
144	0.0120579
145	0.0122304
146	0.0124815
147	0.0128118
148	0.0132136
149	0.013669
150	0.0141501
151	0.0146245
152	0.0150552
153	0.0154063
154	0.0156475
155	0.0157569
156	0.0157275
157	0.0155648
158	0.0152847
159	0.0149124
160	0.0144762
161	0.0140037
162	0.0135169
163	0.0130311
164	0.0125524
165	0.0120816
166	0.0116158
167	0.011153
168	0.0106964
169	0.0102564
170	0.00984876
171	0.00949365
172	0.00921121
173	0.00901742
174	0.00891901
175	0.00891334
176	0.00898751
177	0.00912419
178	0.00930417
179	0.0095128
180	0.00974353
181	0.0100002
182	0.0102998
183	0.0106664
184	0.0111265
185	0.0117013
186	0.0123997
187	0.0132114
188	0.0141041
189	0.0150252
190	0.0159081
191	0.0166786
192	0.0172666
193	0.0176139
194	0.0176853
195	0.0174715
196	0.0169898
197	0.0162846
198	0.0154243
199	0.0144918
200	0.0135802
201	0.0127815
202	0.0121769
203	0.0118307
204	0.0117827
205	0.0120441
206	0.0125974
207	0.013397
208	0.0143735
209	0.0154408
210	0.0165023
211	0.0174632
212	0.018239
213	0.0187644
214	0.0189992
215	0.0189308
216	0.018576
217	0.0179732
218	0.0171761
219	0.0162483
220	0.0152558
221	0.0142635
222	0.0133317
223	0.0125142
224	0.0118549
225	0.0113852
226	0.0111221
227	0.0110677
228	0.011208
229	0.0115164
230	0.01196
231	0.012504
232	0.0131197
233	0.013789
234	0.0145061
235	0.0152793
236	0.0161218
237	0.0170443
238	0.0180477
239	0.0191117
240	0.0201917
241	0.0212215
242	0.02212
243	0.022804
244	0.0232049
245	0.0232794
246	0.0230172
247	0.0224443
248	0.0216193
249	0.0206225
250	0.0195444
251	0.0184743
252	0.0174902
253	0.016651
254	0.0159925
255	0.0155259
256	0.0152423
257	0.0151157
258	0.0151061
259	0.0151675
260	0.0152536
261	0.01532
262	0.01533
263	0.0152619
264	0.0151073
265	0.014875
266	0.0145915
267	0.0142984
268	0.0140497
269	0.0139096
270	0.0139451
271	0.014222
272	0.0147991
273	0.0157206
274	0.0170083
275	0.0186525
276	0.0206077
277	0.0227908
278	0.0250853
279	0.0273508
280	0.0294379
281	0.0312119
282	0.0325656
283	0.0334336
284	0.0338054
285	0.0337212
286	0.0332604
287	0.0325294
288	0.0316431
289	0.0307102
290	0.0298213
291	0.0290393
292	0.0283976
293	0.027902
294	0.027534
295	0.0272575
296	0.0270222
297	0.0267698
298	0.0264397
299	0.025978
300	0.0253413
301	0.0245029
302	0.0234609
303	0.0222374
304	0.0208769
305	0.019446
306	0.0180272
307	0.0167083
308	0.0155721
309	0.0146859
310	0.014094
311	0.01381
312	0.0138146
313	0.0140575
314	0.0144632
315	0.0149391
316	0.0153894
317	0.0157265
318	0.0158814
319	0.0158101
320	0.0155026
321	0.0149785
322	0.0142836
323	0.0134831
324	0.012648
325	0.0118447
326	0.0111274
327	0.0105303
328	0.0100687
329	0.0097418
330	0.00953737
331	0.00944244
332	0.00944862
333	0.00955389
334	0.00976521
335	0.0100946
336	0.0105512
337	0.0111349
338	0.0118313
339	0.012608
340	0.0134155
341	0.0141933
342	0.0148757
343	0.0154018
344	0.0157243
345	0.0158145
346	0.0156621
347	0.0152806
348	0.0147014
349	0.0139706
350	0.0131472
351	0.012296
352	0.0114813
353	0.0107656
354	0.0101991
355	0.0098167
356	0.00963386
357	0.00964468
358	0.00982312
359	0.0101262
360	0.0104995
361	0.0108862
362	0.0112339
363	0.011501
364	0.0116626
365	0.0117111
366	0.0116585
367	0.0115282
368	0.0113537
369	0.0111718
370	0.0110157
371	0.0109102
372	0.0108729
373	0.0109051
374	0.0109959
375	0.0111251
376	0.0112667
377	0.0113966
378	0.011499
379	0.0115727
380	0.0116332
381	0.0117109
382	0.0118467
383	0.0120809
384	0.0124463
385	0.0129572
386	0.013605
387	0.0143574
388	0.015163
389	0.0159587
390	0.0166837
391	0.0172875
392	0.0177373
393	0.0180271
394	0.0181726
395	0.0182035
396	0.0181584
397	0.0180721
398	0.0179711
399	0.0178704
400	0.0177757
401	0.017689
402	0.017614
403	0.0175647
404	0.0175636
405	0.0176428
406	0.0178343
407	0.0181636
408	0.0186395
409	0.0192483
410	0.019952
411	0.0206951
412	0.0214097
413	0.02203
414	0.0225048
415	0.0228094
416	0.0229485
417	0.0229583
418	0.022893
419	0.0228146
420	0.0227738
421	0.0227972
422	0.0228786
423	0.0229788
424	0.0230343
425	0.0229689
426	0.0227145
427	0.0222256
428	0.02149
429	0.020535
430	0.0194224
431	0.0182395
432	0.0170887
433	0.0160655
434	0.0152462
435	0.0146749
436	0.0143572
437	0.0142591
438	0.0143148
439	0.0144354
440	0.0145262
441	0.0145017
442	0.0142992
443	0.0138879
444	0.0132748
445	0.0125023
446	0.0116393
447	0.0107694
448	0.00998303
449	0.00936371
450	0.00898296
451	0.00889541
452	0.00913636
453	0.00972364
454	0.0106561
455	0.0119142
456	0.0134596
457	0.0152344
458	0.0171632
459	0.0191536
460	0.0211013
461	0.022895
462	0.0244291
463	0.0256094
464	0.026366
465	0.0266615
466	0.0264943
467	0.0259044
468	0.024964
469	0.0237752
470	0.0224558
471	0.0211279
472	0.0199057
473	0.0188833
474	0.0181247
475	0.0176569
476	0.0174689
477	0.017515
478	0.017721
479	0.0179985
480	0.0182543
481	0.0184056
482	0.0183885
483	0.0181674
484	0.0177343
485	0.0171097
486	0.0163383
487	0.0154771
488	0.0145902
489	0.0137391
490	0.0129756
491	0.0123376
492	0.0118462
493	0.0115059
494	0.011306
495	0.0112239
496	0.0112277
497	0.0112821
498	0.0113531
499	0.0114144
500	0.0114521
501	0.0114653
502	0.0114698
503	0.0114934
504	0.0115713
505	0.0117377
506	0.0120207
507	0.0124345
508	0.0129787
509	0.0136367
510	0.0143816
511	0.0151828
512	0.0160104
513	0.0168436
514	0.0176712
515	0.0184911
516	0.0193056
517	0.0201174
518	0.020923
519	0.021707
520	0.0224444
521	0.0230984
522	0.023622
523	0.0239683
524	0.0240965
525	0.0239792
526	0.0236098
527	0.0230107
528	0.0222279
529	0.0213311
530	0.020404
531	0.0195331
532	0.018798
533	0.0182592
534	0.017953
535	0.0178874
536	0.0180432
537	0.0183759
538	0.0188213
539	0.0193047
540	0.0197467
541	0.0200759
542	0.0202367
543	0.020195
544	0.019944
545	0.0195071
546	0.0189316
547	0.0182804
548	0.0176267
549	0.0170399
550	0.0165757
551	0.0162695
552	0.0161338
553	0.0161564
554	0.0163057
555	0.0165374
556	0.0168037
557	0.0170602
558	0.0172759
559	0.0174329
560	0.0175294
561	0.0175757
562	0.0175917
563	0.0175981
564	0.0176138
565	0.017652
566	0.0177199
567	0.0178215
568	0.0179557
569	0.0181222
570	0.0183195
571	0.0185453
572	0.0187926
573	0.0190526
574	0.0193124
575	0.0195564
576	0.0197697
577	0.0199404
578	0.0200586
579	0.020123
580	0.0201342
581	0.0200985
582	0.0200256
583	0.0199295
584	0.0198256
585	0.0197302
586	0.0196613
587	0.0196329
588	0.019657
589	0.019738
590	0.0198759
591	0.0200622
592	0.0202819
593	0.0205127
594	0.0207267
595	0.0208952
596	0.0209897
597	0.0209906
598	0.0208911
599	0.0206968
600	0.0204323
601	0.0201291
602	0.0198224
603	0.0195445
604	0.0193151
605	0.0191385
606	0.0190043
607	0.0188935
608	0.0187817
609	0.0186512
610	0.018494
611	0.0183172
612	0.018141
613	0.0179953
614	0.0179143
615	0.0179263
616	0.0180515
617	0.0182926
618	0.0186339
619	0.0190406
620	0.0194604
621	0.0198315
622	0.020086
623	0.0201592
624	0.0199998
625	0.0195756
626	0.0188785
627	0.0179257
628	0.0167609
629	0.0154437
630	0.0140429
631	0.0126267
632	0.0112544
633	0.00997358
634	0.00881866
635	0.00781333
636	0.00697411
637	0.00631768
638	0.00586269
639	0.00563304
640	0.00565422
641	0.00594853
642	0.00652965
643	0.00739404
644	0.00851508
645	0.00983998
646	0.0112898
647	0.0127647
648	0.0141521
649	0.0153391
650	0.0162293
651	0.0167517
652	0.0168749
653	0.0166074
654	0.0159996
655	0.0151403
656	0.0141414
657	0.0131254
658	0.0122121
659	0.0115022
660	0.0110682
661	0.0109475
662	0.0111376
663	0.0115979
664	0.0122553
665	0.0130128
666	0.0137619
667	0.0143963
668	0.0148261
669	0.0149894
670	0.014857
671	0.0144392
672	0.0137774
673	0.0129417
674	0.012016
675	0.0110856
676	0.0102288
677	0.00950659
678	0.00895699
679	0.00859407
680	0.00840821
681	0.00836983
682	0.00843635
683	0.00855926
684	0.00868986
685	0.00878901
686	0.00882973
687	0.00879971
688	0.00870237
689	0.00855458
690	0.00838273
691	0.00821561
692	0.00808293
693	0.00800881
694	0.00801069
695	0.00809911
696	0.00827508
697	0.00853051
698	0.00884879
699	0.00920838
700	0.00958204
701	0.00994224
702	0.0102639
703	0.0105292
704	0.0107324
705	0.0108795
706	0.0109909
707	0.0110984
708	0.0112387
709	0.0114495
710	0.0117614
711	0.0121953
712	0.0127576
713	0.013439
714	0.0142176
715	0.0150597
716	0.0159269
717	0.0167805
718	0.0175819
719	0.0182947
720	0.0188902
721	0.0193415
722	0.0196272
723	0.0197297
724	0.0196381
725	0.0193505
726	0.0188776
727	0.0182453
728	0.0174958
729	0.0166848
730	0.0158788
731	0.0151458
732	0.0145487
733	0.0141383
734	0.0139469
735	0.0139847
736	0.0142402
737	0.014684
738	0.0152757
739	0.0159687
740	0.0167151
741	0.0174724
742	0.018202
743	0.0188701
744	0.0194434
745	0.0198875
746	0.0201676
747	0.0202498
748	0.0201077
749	0.0197263
750	0.0191125
751	0.0182949
752	0.0173265
753	0.016281
754	0.015244
755	0.0143077
756	0.0135583
757	0.0130665
758	0.0128813
759	0.0130236
760	0.0134842
761	0.0142252
762	0.015185
763	0.0162853
764	0.0174415
765	0.0185696
766	0.0195912
767	0.0204412
768	0.0210691
769	0.0214389
770	0.0215275
771	0.0213273
772	0.020846
773	0.0201059
774	0.0191462
775	0.0180172
776	0.0167813
777	0.0155053
778	0.0142535
779	0.0130855
780	0.0120489
781	0.0111788
782	0.0104969
783	0.0100141
784	0.00973187
785	0.00964528
786	0.00974493
787	0.0100133
788	0.0104258
789	0.0109512
790	0.0115503
791	0.0121786
792	0.0127886
793	0.013337
794	0.013787
795	0.0141129
796	0.0142997
797	0.0143466
798	0.014263
799	0.0140638
800	0.0137697
801	0.0134005
802	0.0129752
803	0.0125088
804	0.0120126
805	0.011496
806	0.0109649
807	0.0104275
808	0.00989079
809	0.00936275
810	0.00885442
811	0.00837802
812	0.00794761
813	0.0075772
814	0.00728196
815	0.00707669
816	0.00697265
817	0.0069771
818	0.00709069
819	0.00730979
820	0.00762154
821	0.00800839
822	0.00844983
823	0.00892652
824	0.00942493
825	0.00993946
826	0.0104767
827	0.0110498
828	0.0116774
829	0.0123733
830	0.013138
831	0.0139546
832	0.014786
833	0.0155771
834	0.0162638
835	0.0167837
836	0.0170911
837	0.0171625
838	0.0170079
839	0.0166667
840	0.016206
841	0.0157077
842	0.0152561
843	0.0149266
844	0.014773
845	0.014821
846	0.0150658
847	0.0154731
848	0.0159865
849	0.0165347
850	0.0170431
851	0.0174407
852	0.0176698
853	0.0176917
854	0.0174883
855	0.0170637
856	0.0164402
857	0.0156571
858	0.0147624
859	0.0138065
860	0.0128386
861	0.0119009
862	0.0110263
863	0.0102373
864	0.0095491
865	0.0089723
866	0.00851315
867	0.00817971
868	0.0079771
869	0.00790809
870	0.00797033
871	0.00815302
872	0.00843592
873	0.00879147
874	0.00918693
875	0.00959002
876	0.00997329
877	0.0103201
878	0.0106273
879	0.0109095
880	0.0111951
881	0.0115229
882	0.0119357
883	0.0124744
884	0.0131698
885	0.014037
886	0.0150737
887	0.0162561
888	0.0175437
889	0.0188837
890	0.0202177
891	0.0214917
892	0.0226597
893	0.0236876
894	0.024556
895	0.025258
896	0.0257939
897	0.0261675
898	0.0263851
899	0.0264532
900	0.0263795
901	0.026178
902	0.0258684
903	0.025476
904	0.0250297
905	0.0245602
906	0.0240964
907	0.0236639
908	0.0232844
909	0.0229734
910	0.02274
911	0.022588
912	0.0225138
913	0.0225069
914	0.0225486
915	0.0226136
916	0.0226757
917	0.0227097
918	0.0226945
919	0.0226173
920	0.0224736
921	0.0222621
922	0.0219828
923	0.0216313
924	0.021199
925	0.0206691
926	0.0200217
927	0.0192394
928	0.0183108
929	0.017239
930	0.0160435
931	0.0147599
932	0.0134394
933	0.0121399
934	0.0109213
935	0.00983765
936	0.0089295
937	0.00822079
938	0.00771813
939	0.00741169
940	0.00728193
941	0.00730413
942	0.00745365
943	0.00771179
944	0.00806397
945	0.00850228
946	0.00901924
947	0.00960553
948	0.0102469
949	0.0109214
950	0.0116005
951	0.0122529
952	0.0128464
953	0.0133541
954	0.0137545
955	0.014036
956	0.0141955
957	0.0142416
958	0.0141906
959	0.014066
960	0.0138953
961	0.0137095
962	0.0135377
963	0.0134032
964	0.0133205
965	0.0132948
966	0.0133221
967	0.0133921
968	0.013492
969	0.013611
970	0.013741
971	0.0138766
972	0.0140173
973	0.0141614
974	0.0143054
975	0.0144407
976	0.0145539
977	0.0146242
978	0.014629
979	0.0145426
980	0.0143387
981	0.0139946
982	0.013496
983	0.0128391
984	0.0120382
985	0.0111239
986	0.0101454
987	0.0091651
988	0.0082551
989	0.00748884
990	0.00693254
991	0.00663824
992	0.0066358
993	0.00693277
994	0.00751147
995	0.00833293
996	0.00934086
997	0.0104703
998	0.0116526
999	0.0128264
[truncated: 1 more rows]

## Sheet: Supp_6_E_1
-0.1	0.0611354
-0.09	0.163028
-0.08	0.101892
-0.07	3.05693e-18
-0.06	0.040757
-0.05	0.163028
-0.04	0.0815139
-0.03	0.101892
-0.02	0.0611354
-0.01	0.0611354
0	0.0611354
0.01	0.0203785
0.02	0.0203785
0.03	0.0203785
0.04	0.0203785
0.05	0.040757
0.06	7.58829e-18
0.07	3.09369e-18
0.08	0.101892
0.09	2.68509e-18
0.1	0.0815139

## Sheet: Supp_6_E_2
-1000	0.00911102
-999	0.00877027
-998	0.00844474
-997	0.00816449
-996	0.00794821
-995	0.00780462
-994	0.00773395
-993	0.00773282
-992	0.00779481
-991	0.00791247
-990	0.0080782
-989	0.00828222
-988	0.00851199
-987	0.00875247
-986	0.00898477
-985	0.00918876
-984	0.00934629
-983	0.00944112
-982	0.00946487
-981	0.00941522
-980	0.00929869
-979	0.00913006
-978	0.00893293
-977	0.00873359
-976	0.0085609
-975	0.00844023
-974	0.00839062
-973	0.00842107
-972	0.00853149
-971	0.00871029
-970	0.00893863
-969	0.00919229
-968	0.00944708
-967	0.00968152
-966	0.00988345
-965	0.0100511
-964	0.0101932
-963	0.0103312
-962	0.0104916
-961	0.0107042
-960	0.0109922
-959	0.0113668
-958	0.0118195
-957	0.0123222
-956	0.0128249
-955	0.013262
-954	0.013561
-953	0.0136534
-952	0.0134855
-951	0.0130304
-950	0.0122917
-949	0.0113066
-948	0.0101387
-947	0.008873
-946	0.00760325
-945	0.0064207
-944	0.00540524
-943	0.00461718
-942	0.00409436
-941	0.00384948
-940	0.00387321
-939	0.0041357
-938	0.00459212
-937	0.00518797
-936	0.00586494
-935	0.00656675
-934	0.00724383
-933	0.00785599
-932	0.00837563
-931	0.00878634
-930	0.00908251
-929	0.00926594
-928	0.00934573
-927	0.00933385
-926	0.00924398
-925	0.00909335
-924	0.00889786
-923	0.00867267
-922	0.00843158
-921	0.00818672
-920	0.00794929
-919	0.0077296
-918	0.00753737
-917	0.00738005
-916	0.00726475
-915	0.00719526
-914	0.00717228
-913	0.00719381
-912	0.00725566
-911	0.00735329
-910	0.00748274
-909	0.00764225
-908	0.00782842
-907	0.00803637
-906	0.00825576
-905	0.00846748
-904	0.00864521
-903	0.00875811
-902	0.00877507
-901	0.00867258
-900	0.00844025
-899	0.00808876
-898	0.00764771
-897	0.00716547
-896	0.00669975
-895	0.00630988
-894	0.00604674
-893	0.00594279
-892	0.00600754
-891	0.00622448
-890	0.00655463
-889	0.00694225
-888	0.00732642
-887	0.00764942
-886	0.0078685
-885	0.00796255
-884	0.00793579
-883	0.00781396
-882	0.00764142
-881	0.00746927
-880	0.00734714
-879	0.00731276
-878	0.00738956
-877	0.00758036
-876	0.00787154
-875	0.00823725
-874	0.00864381
-873	0.00905885
-872	0.00945374
-871	0.00981042
-870	0.0101198
-869	0.0103824
-868	0.010606
-867	0.010803
-866	0.0109853
-865	0.0111622
-864	0.0113373
-863	0.0115073
-862	0.0116617
-861	0.0117867
-860	0.0118676
-859	0.0118919
-858	0.0118532
-857	0.0117555
-856	0.011611
-855	0.0114387
-854	0.0112645
-853	0.0111136
-852	0.0110097
-851	0.010969
-850	0.0110006
-849	0.0111037
-848	0.011266
-847	0.0114665
-846	0.0116772
-845	0.0118651
-844	0.0119966
-843	0.0120436
-842	0.0119839
-841	0.0118072
-840	0.0115139
-839	0.0111172
-838	0.0106391
-837	0.0101095
-836	0.00956177
-835	0.00902963
-834	0.00854275
-833	0.00812862
-832	0.00780649
-831	0.00758911
-830	0.00748152
-829	0.0074817
-828	0.00758251
-827	0.00776987
-826	0.00802547
-825	0.00832811
-824	0.0086551
-823	0.00898222
-822	0.00928895
-821	0.00955556
-820	0.00976915
-819	0.00991889
-818	0.0100001
-817	0.0100127
-816	0.00996486
-815	0.00987184
-814	0.00975556
-813	0.00964138
-812	0.00956015
-811	0.00953805
-810	0.00959382
-809	0.00973465
-808	0.00995388
-807	0.0102315
-806	0.0105373
-805	0.0108349
-804	0.0110902
-803	0.0112757
-802	0.0113744
-801	0.0113831
-800	0.0113107
-799	0.0111816
-798	0.0110276
-797	0.0108852
-796	0.0107905
-795	0.0107744
-794	0.0108603
-793	0.0110584
-792	0.0113622
-791	0.0117516
-790	0.0121906
-789	0.0126299
-788	0.013012
-787	0.0132801
-786	0.013384
-785	0.0132898
-784	0.0129835
-783	0.0124784
-782	0.0118099
-781	0.011032
-780	0.0102067
-779	0.00939436
-778	0.00864786
-777	0.00800455
-776	0.00748518
-775	0.00709615
-774	0.00683112
-773	0.00667974
-772	0.00663052
-771	0.00667362
-770	0.00680204
-769	0.00701336
-768	0.00730476
-767	0.00767129
-766	0.00810474
-765	0.00859224
-764	0.00911702
-763	0.00965789
-762	0.0101945
-761	0.0107058
-760	0.0111738
-759	0.0115808
-758	0.0119094
-757	0.0121443
-756	0.0122708
-755	0.0122763
-754	0.0121543
-753	0.0119049
-752	0.0115375
-751	0.0110721
-750	0.0105381
-749	0.00996744
-748	0.00939445
-747	0.00884668
-746	0.00834119
-745	0.00788305
-744	0.00746637
-743	0.00707848
-742	0.00670514
-741	0.00633774
-740	0.00597657
-739	0.00563438
-738	0.0053329
-737	0.00509835
-736	0.00495626
-735	0.00492522
-734	0.0050108
-733	0.0052039
-732	0.00548178
-731	0.00581115
-730	0.00615449
-729	0.00647807
-728	0.00675483
-727	0.00697127
-726	0.00712772
-725	0.00723535
-724	0.0073127
-723	0.00738043
-722	0.00745657
-721	0.00755149
-720	0.0076667
-719	0.00779453
-718	0.00792043
-717	0.00802708
-716	0.00809901
-715	0.00812639
-714	0.00810924
-713	0.00805838
-712	0.00799258
-711	0.00793552
-710	0.00791042
-709	0.00793357
-708	0.00801278
-707	0.00813995
-706	0.00829339
-705	0.00844094
-704	0.00854513
-703	0.00857143
-702	0.0084944
-701	0.00830602
-700	0.00801802
-699	0.00766012
-698	0.00727715
-697	0.00691914
-696	0.00663266
-695	0.00645213
-694	0.00639267
-693	0.00644754
-692	0.00659033
-691	0.00677838
-690	0.00696187
-689	0.00709247
-688	0.00712939
-687	0.00705222
-686	0.00685909
-685	0.00656947
-684	0.00622148
-683	0.00586589
-682	0.00556126
-681	0.00536413
-680	0.00532116
-679	0.00546357
-678	0.00580054
-677	0.00631859
-676	0.00698054
-675	0.0077311
-674	0.00850262
-673	0.00922496
-672	0.00983432
-671	0.0102839
-670	0.0105475
-669	0.0106245
-668	0.0105374
-667	0.0103238
-666	0.0100327
-665	0.00971252
-664	0.00940399
-663	0.00913426
-662	0.0089138
-661	0.0087373
-660	0.0085883
-659	0.0084424
-658	0.00827349
-657	0.008058
-656	0.00778024
-655	0.00743214
-654	0.0070148
-653	0.0065368
-652	0.00601226
-651	0.00545936
-650	0.00490023
-649	0.00435909
-648	0.00386279
-647	0.00343938
-646	0.00311638
-645	0.00291873
-644	0.00286623
-643	0.00297073
-642	0.00323381
-641	0.00364549
-640	0.00418312
-639	0.00481353
-638	0.00549485
-637	0.0061803
-636	0.00682323
-635	0.00738008
-634	0.00781648
-633	0.00810844
-632	0.00824613
-631	0.00823245
-630	0.00808377
-629	0.00782672
-628	0.00749764
-627	0.00713899
-626	0.00679373
-625	0.00650345
-624	0.00630169
-623	0.00621042
-622	0.00623718
-621	0.00637414
-620	0.00659951
-619	0.00688178
-618	0.00718368
-617	0.00746907
-616	0.00770511
-615	0.00787037
-614	0.00795165
-613	0.00794662
-612	0.00786123
-611	0.00770906
-610	0.00750807
-609	0.00728065
-608	0.00704869
-607	0.00683198
-606	0.00664669
-605	0.00650057
-604	0.00639251
-603	0.00631213
-602	0.00624149
-601	0.0061599
-600	0.00604934
-599	0.00589945
-598	0.00571372
-597	0.00550848
-596	0.00531427
-595	0.0051676
-594	0.00510651
-593	0.00516121
-592	0.00534656
-591	0.00565689
-590	0.00606424
-589	0.00651987
-588	0.00696146
-587	0.00732176
-586	0.00753988
-585	0.00756975
-584	0.00738986
-583	0.00700605
-582	0.00645281
-581	0.00578597
-580	0.00507624
-579	0.00440099
-578	0.00383548
-577	0.00344597
-576	0.00328387
-575	0.00338474
-574	0.00376384
-573	0.00441802
-572	0.00532499
-571	0.00644593
-570	0.00772815
-569	0.0091096
-568	0.0105233
-567	0.0119031
-566	0.0131872
-565	0.0143274
-564	0.0152883
-563	0.0160511
-562	0.0166111
-561	0.0169792
-560	0.0171751
-559	0.0172221
-558	0.0171426
-557	0.016956
-556	0.0166744
-555	0.0163007
-554	0.0158338
-553	0.0152646
-552	0.0145835
-551	0.0137812
-550	0.0128542
-549	0.0118079
-548	0.0106605
-547	0.00944311
-546	0.00820052
-545	0.00698506
-544	0.00585475
-543	0.00486648
-542	0.00407159
-541	0.00350976
-540	0.00320665
-539	0.00317232
-538	0.00340114
-537	0.00386952
-536	0.00454084
-535	0.00536686
-534	0.00629232
-533	0.0072618
-532	0.00822476
-531	0.00914298
-530	0.00999212
-529	0.010765
-528	0.0114684
-527	0.0121184
-526	0.0127319
-525	0.0133213
-524	0.0138879
-523	0.0144196
-522	0.0148916
-521	0.0152714
-520	0.0155251
-519	0.0156219
-518	0.0155401
-517	0.0152742
-516	0.014832
-515	0.0142377
-514	0.0135259
-513	0.0127404
-512	0.0119278
-511	0.0111344
-510	0.0104029
-509	0.0097689
-508	0.00925797
-507	0.00888716
-506	0.00866345
-505	0.00858491
-504	0.00864342
-503	0.00882762
-502	0.00912457
-501	0.00952185
-500	0.0100095
-499	0.0105797
-498	0.0112227
-497	0.0119232
-496	0.0126599
-495	0.0134014
-494	0.01411
-493	0.0147414
-492	0.0152523
-491	0.0156016
-490	0.0157593
-489	0.0157057
-488	0.0154381
-487	0.0149673
-486	0.0143199
-485	0.0135369
-484	0.0126701
-483	0.0117798
-482	0.0109311
-481	0.0101843
-480	0.00958798
-479	0.00917231
-478	0.00894453
-477	0.00888593
-476	0.00895528
-475	0.00909559
-474	0.00924302
-473	0.00933838
-472	0.00933567
-471	0.00920975
-470	0.00895761
-469	0.00859826
-468	0.00816611
-467	0.00770775
-466	0.00727406
-465	0.00691438
-464	0.00667277
-463	0.00658295
-462	0.00666591
-461	0.00692989
-460	0.00736833
-459	0.00796115
-458	0.00867277
-457	0.00945732
-456	0.0102595
-455	0.01102
-454	0.011681
-453	0.0121931
-452	0.012521
-451	0.0126491
-450	0.0125826
-449	0.0123473
-448	0.0119848
-447	0.0115461
-446	0.0110845
-445	0.0106492
-444	0.0102816
-443	0.0100114
-442	0.00985617
-441	0.0098223
-440	0.00990678
-439	0.0100958
-438	0.0103707
-437	0.010702
-436	0.0110536
-435	0.0113829
-434	0.011645
-433	0.0118002
-432	0.0118185
-431	0.011689
-430	0.0114229
-429	0.0110555
-428	0.0106411
-427	0.0102437
-426	0.00992683
-425	0.00974214
-424	0.00971935
-423	0.00986296
-422	0.0101514
-421	0.0105414
-420	0.0109751
-419	0.0113924
-418	0.0117359
-417	0.0119635
-416	0.0120509
-415	0.0119952
-414	0.011813
-413	0.011535
-412	0.0112036
-411	0.0108625
-410	0.0105516
-409	0.0103009
-408	0.01013
-407	0.0100459
-406	0.010045
-405	0.0101152
-404	0.0102386
-403	0.0103931
-402	0.0105553
-401	0.0107024
-400	0.0108154
-399	0.0108793
-398	0.0108868
-397	0.010837
-396	0.0107329
-395	0.0105794
-394	0.0103804
-393	0.0101355
-392	0.00984014
-391	0.00948613
-390	0.00906835
-389	0.00858602
-388	0.00804807
-387	0.00747843
-386	0.00691316
-385	0.00640084
-384	0.00599563
-383	0.00575187
-382	0.00571437
-381	0.00591219
-380	0.00635233
-379	0.00701666
-378	0.00786344
-377	0.00883095
-376	0.00984737
-375	0.0108389
-374	0.0117404
-373	0.012506
-372	0.0131115
-371	0.0135612
-370	0.0138788
-369	0.0141051
-368	0.0142871
-367	0.014467
-366	0.0146785
-365	0.0149388
-364	0.0152492
-363	0.0155961
-362	0.0159572
-361	0.0163039
-360	0.0166086
-359	0.0168472
-358	0.0169987
-357	0.0170472
-356	0.0169779
-355	0.0167768
-354	0.0164303
-353	0.0159252
-352	0.015254
-351	0.0144174
-350	0.0134321
-349	0.0123313
-348	0.0111658
-347	0.0100004
-346	0.00890488
-345	0.00794672
-344	0.00718066
-343	0.00664097
-342	0.00633556
-341	0.00624668
-340	0.00633159
-339	0.00653011
-338	0.00677476
-337	0.00699838
-336	0.00714497
-335	0.00717688
-334	0.00708008
-333	0.00686295
-332	0.00655423
-331	0.0061966
-330	0.00584065
-329	0.0055361
-328	0.0053241
-327	0.00523211
-326	0.0052717
-325	0.0054365
-324	0.00570596
-323	0.00604869
-322	0.0064297
-321	0.00681463
-320	0.00717832
-319	0.00750534
-318	0.00779215
-317	0.00804785
-316	0.00828962
-315	0.00853833
-314	0.00881311
-313	0.00912935
-312	0.00949126
-311	0.00989121
-310	0.0103086
-309	0.0107128
-308	0.0110682
-307	0.0113371
-306	0.0114863
-305	0.0114949
-304	0.0113554
-303	0.0110788
-302	0.0106908
-301	0.0102318
-300	0.00974713
-299	0.00928423
-298	0.00888203
-297	0.00856552
-296	0.00834365
-295	0.00820731
-294	0.00813311
-293	0.00808808
-292	0.00803872
-291	0.00795668
-290	0.00782534
-289	0.00764282
-288	0.00742253
-287	0.00719107
-286	0.00698049
-285	0.00682104
-284	0.00673508
-283	0.00673031
-282	0.00679848
-281	0.00691546
-280	0.0070455
-279	0.00714612
-278	0.00717809
-277	0.00710975
-276	0.0069223
-275	0.00661462
-274	0.00620151
-273	0.00571134
-272	0.00518247
-271	0.00465642
-270	0.00417228
-269	0.00376046
-268	0.00343911
-267	0.0032128
-266	0.00307394
-265	0.00300522
-264	0.00298412
-263	0.0029879
-262	0.00299787
-261	0.0030015
-260	0.00299591
-259	0.00298471
-258	0.00297525
-257	0.00297708
-256	0.00299857
-255	0.00304441
-254	0.00311635
-253	0.00321449
-252	0.00333814
-251	0.00348866
-250	0.00366996
-249	0.00389029
-248	0.0041587
-247	0.00448301
-246	0.00486653
-245	0.00530523
-244	0.00578626
-243	0.00628828
-242	0.0067835
-241	0.00724107
-240	0.00762906
-239	0.0079197
-238	0.00809082
-237	0.00812587
-236	0.00801595
-235	0.00775948
-234	0.00736358
-233	0.00684459
-232	0.00622843
-231	0.00555127
-230	0.00485541
-229	0.00418689
-228	0.00359252
-227	0.00311521
-226	0.00279091
-225	0.0026447
-224	0.00268934
-223	0.00292396
-222	0.00333375
-221	0.00389145
-220	0.00455835
-219	0.00528759
-218	0.00602836
-217	0.00673094
-216	0.00735093
-215	0.00785434
-214	0.00821954
-213	0.00843869
-212	0.00851854
-211	0.0084759
-210	0.00833916
-209	0.00813874
-208	0.00790639
-207	0.00767177
-206	0.00745998
-205	0.00729276
-204	0.00718662
-203	0.00715387
-202	0.00720341
-201	0.00733873
-200	0.00755972
-199	0.00785946
-198	0.00822358
-197	0.00862941
-196	0.00904547
-195	0.00943421
-194	0.0097544
-193	0.00996617
-192	0.0100359
-191	0.00994237
-190	0.00967704
-189	0.00925126
-188	0.00868877
-187	0.00802246
-186	0.00729015
-185	0.0065287
-184	0.00577165
-183	0.00504768
-182	0.00437899
-181	0.00378523
-180	0.00328176
-179	0.00288198
-178	0.00259647
-177	0.00243197
-176	0.00239157
-175	0.00247078
-174	0.00265939
-173	0.00294159
-172	0.00329638
-171	0.00370068
-170	0.0041327
-169	0.00457259
-168	0.00500715
-167	0.00543076
-166	0.00584304
-165	0.00624736
-164	0.00664824
-163	0.0070458
-162	0.0074354
-161	0.00780285
-160	0.00812715
-159	0.00838139
-158	0.0085383
-157	0.00857588
-156	0.00848164
-155	0.00826103
-154	0.00793384
-153	0.00753359
-152	0.00710429
-151	0.00669169
-150	0.00633672
-149	0.00606923
-148	0.00590423
-147	0.00583992
-146	0.00586025
-145	0.00593797
-144	0.00603877
-143	0.00612921
-142	0.00617762
-141	0.00616006
-140	0.00606093
-139	0.00587578
-138	0.00560918
-137	0.00527449
-136	0.00489247
-135	0.00448693
-134	0.00408676
-133	0.00371893
-132	0.00340637
-131	0.00316621
-130	0.00300725
-129	0.00292924
-128	0.00292349
-127	0.00297549
-126	0.00306746
-125	0.0031824
-124	0.00330712
-123	0.0034339
-122	0.00356447
-121	0.00370836
-120	0.00388012
-119	0.00409764
-118	0.00438006
-117	0.0047446
-116	0.00520422
-115	0.00576585
-114	0.00642753
-113	0.00718083
-112	0.00800496
-111	0.00887074
-110	0.00974207
-109	0.01058
-108	0.0113489
-107	0.0120232
-106	0.0125919
-105	0.013062
-104	0.0134587
-103	0.0138194
-102	0.0141868
-101	0.014599
-100	0.0150819
-99	0.0156385
-98	0.016245
-97	0.0168524
-96	0.0173936
-95	0.0177937
-94	0.0179843
-93	0.0179153
-92	0.0175698
-91	0.016962
-90	0.0161377
-89	0.0151661
-88	0.014127
-87	0.0130968
-86	0.0121386
-85	0.0112923
-84	0.010571
-83	0.00996325
-82	0.00943785
-81	0.00895201
-80	0.00846141
-79	0.00792834
-78	0.00733024
-77	0.00666014
-76	0.00592737
-75	0.00515657
-74	0.0043812
-73	0.00363868
-72	0.00296399
-71	0.00238899
-70	0.00193621
-69	0.0016202
-68	0.00144605
-67	0.00141167
-66	0.00150858
-65	0.00172499
-64	0.00204693
-63	0.00245983
-62	0.00295016
-61	0.00350584
-60	0.00411521
-59	0.00476822
-58	0.00545297
-57	0.00615711
-56	0.00686464
-55	0.00755494
-54	0.00820426
-53	0.00878953
-52	0.00929077
-51	0.0096955
-50	0.0100055
-49	0.0102342
-48	0.010411
-47	0.0105738
-46	0.0107643
-45	0.0110227
-44	0.0113816
-43	0.0118597
-42	0.0124597
-41	0.0131679
-40	0.0139545
-39	0.0147754
-38	0.0155773
-37	0.0163024
-36	0.0168964
-35	0.017316
-34	0.0175344
-33	0.017542
-32	0.0173488
-31	0.0169791
-30	0.0164627
-29	0.0158323
-28	0.0151139
-27	0.0143266
-26	0.0134827
-25	0.0125881
-24	0.0116484
-23	0.010673
-22	0.00967552
-21	0.00867594
-20	0.00770011
-19	0.0067795
-18	0.00594651
-17	0.0052343
-16	0.00467179
-15	0.00428054
-14	0.00407201
-13	0.00404589
-12	0.00418765
-11	0.00446935
-10	0.00485251
-9	0.00529058
-8	0.00573511
-7	0.00614062
-6	0.00646888
-5	0.00669465
-4	0.00680448
-3	0.00679929
-2	0.0066909
-1	0.00649907
0	0.00624837
1	0.00596301
2	0.00566692
3	0.00537924
4	0.00511551
5	0.0048874
6	0.00470364
7	0.00457096
8	0.00449389
9	0.00447622
10	0.00451783
11	0.00461354
12	0.00475209
13	0.00491452
14	0.00507604
15	0.005208
16	0.00528335
17	0.00527943
18	0.0051852
19	0.00500139
20	0.00474155
21	0.00443116
22	0.00410171
23	0.00378723
24	0.00351828
25	0.00331761
26	0.00319727
27	0.00315784
28	0.00318975
29	0.00327528
30	0.0033932
31	0.0035217
32	0.0036412
33	0.00373689
34	0.0037981
35	0.00381849
36	0.00379543
37	0.00372974
38	0.00362495
39	0.00348858
40	0.00333108
41	0.00316657
42	0.00301061
43	0.00287806
44	0.00278043
45	0.00272334
46	0.00270485
47	0.00271517
48	0.00273798
49	0.00275312
50	0.0027402
51	0.00268229
52	0.00256842
53	0.00239717
54	0.00217504
55	0.00191604
56	0.00164003
57	0.00136909
58	0.0011258
59	0.000931244
60	0.000803858
61	0.00075802
62	0.000804609
63	0.000949877
64	0.00119549
65	0.00153673
66	0.00196248
67	0.00245469
68	0.00298873
69	0.00353464
70	0.00405967
71	0.00453148
72	0.00492217
73	0.00521015
74	0.00538563
75	0.00544867
76	0.00540815
77	0.00528085
78	0.00508647
79	0.00484448
80	0.00457126
81	0.00427993
82	0.00398101
83	0.00368446
84	0.00340127
85	0.00314701
86	0.00294006
87	0.0028008
88	0.0027493
89	0.00280115
90	0.00296354
91	0.00323308
92	0.00359536
93	0.00402526
94	0.00449036
95	0.00495825
96	0.00540086
97	0.00579998
98	0.00615205
99	0.0064698
100	0.00677996
101	0.00711663
102	0.00751437
103	0.00800005
104	0.00858612
105	0.00926557
106	0.010012
107	0.0107825
108	0.0115204
109	0.012164
110	0.0126548
111	0.0129439
112	0.012999
113	0.0128112
114	0.0123968
115	0.0117975
116	0.0110784
117	0.0103202
118	0.00960914
119	0.00902646
120	0.00863793
121	0.00848614
122	0.00858555
123	0.0089215
124	0.00945309
125	0.0101201
126	0.0108514
127	0.0115717
128	0.0122144
129	0.0127232
130	0.0130587
131	0.0131996
132	0.0131441
133	0.0129066
134	0.0125136
135	0.0119976
136	0.0113939
137	0.010733
138	0.0100382
139	0.00932336
140	0.00859436
141	0.00785359
142	0.00710265
143	0.00634865
144	0.00560695
145	0.00490038
146	0.00425883
147	0.00371485
148	0.0032991
149	0.00303673
150	0.0029433
151	0.00302259
152	0.00326528
153	0.00365007
154	0.00414691
155	0.00471901
156	0.00532611
157	0.00593257
158	0.00650599
159	0.00702506
160	0.00747764
161	0.00786269
162	0.00819046
163	0.00847934
164	0.00875478
165	0.00904713
166	0.00938704
167	0.00980328
168	0.010315
169	0.0109291
170	0.0116349
171	0.0124
172	0.0131728
173	0.0138869
174	0.0144689
175	0.0148518
176	0.0149841
177	0.0148393
178	0.014426
179	0.0137829
180	0.012978
181	0.0120956
182	0.011227
183	0.0104567
184	0.00985207
185	0.00945579
186	0.00928341
187	0.00932456
188	0.00954783
189	0.00990664
190	0.0103463
191	0.0108122
192	0.0112533
193	0.0116243
194	0.0118908
195	0.0120301
196	0.0120353
197	0.0119163
198	0.0116981
199	0.0114215
200	0.011137
201	0.0108998
202	0.0107591
203	0.0107511
204	0.0108923
205	0.0111752
206	0.0115683
207	0.0120184
208	0.0124598
209	0.0128205
210	0.0130323
211	0.0130398
212	0.012806
213	0.0123192
214	0.0115909
215	0.0106537
216	0.00955821
217	0.00836587
218	0.00714316
219	0.00595466
220	0.00485704
221	0.00389537
222	0.00310119
223	0.0024918
224	0.00206989
225	0.00182602
226	0.00174073
227	0.0017874
228	0.00193504
229	0.00215121
230	0.00240534
231	0.00267064
232	0.00292788
233	0.00316473
234	0.00337738
235	0.00357
236	0.00375034
237	0.00392734
238	0.00410729
239	0.00429238
240	0.00447908
241	0.00465872
242	0.00481936
243	0.00494832
244	0.0050358
245	0.00507598
246	0.00506961
247	0.00502327
248	0.00494853
249	0.00486196
250	0.00478085
251	0.00472144
252	0.00469681
253	0.00471545
254	0.00478216
255	0.00489543
256	0.00505064
257	0.00524166
258	0.00546051
259	0.0056991
260	0.0059522
261	0.00621825
262	0.00650199
263	0.00681575
264	0.0071794
265	0.00761878
266	0.00815959
267	0.00882401
268	0.00962293
269	0.0105492
270	0.0115761
271	0.0126573
272	0.0137312
273	0.014728
274	0.0155783
275	0.0162261
276	0.0166327
277	0.0167817
278	0.0166805
279	0.0163567
280	0.0158506
281	0.0152115
282	0.0144883
283	0.0137256
284	0.0129618
285	0.0122258
286	0.0115404
287	0.0109209
288	0.0103786
289	0.00992359
290	0.00956359
291	0.00930573
292	0.00915549
293	0.0091176
294	0.009193
295	0.00937606
296	0.00965432
297	0.0100079
298	0.0104079
299	0.0108176
300	0.0111974
301	0.0115063
302	0.0117103
303	0.0117839
304	0.0117146
305	0.0115063
306	0.0111759
307	0.0107537
308	0.0102795
309	0.00979758
310	0.0093527
311	0.00898355
312	0.0087194
313	0.00857682
314	0.00856029
315	0.00866283
316	0.00886883
317	0.009156
318	0.00949889
319	0.00987018
320	0.0102398
321	0.0105759
322	0.0108452
323	0.0110159
324	0.0110594
325	0.0109551
326	0.0106948
327	0.0102829
328	0.00973661
329	0.00908422
330	0.00836143
331	0.00760512
332	0.00684843
333	0.00611687
334	0.00542648
335	0.00478483
336	0.00419371
337	0.00365075
338	0.00315603
339	0.00271459
340	0.00233833
341	0.00204651
342	0.00186547
343	0.00182647
344	0.00196273
345	0.00230479
346	0.00287669
347	0.00369025
348	0.00474055
349	0.00600139
350	0.00742386
351	0.00893766
352	0.0104548
353	0.0118771
354	0.0131069
355	0.0140566
356	0.0146604
357	0.0148849
358	0.0147287
359	0.0142243
360	0.0134351
361	0.012446
362	0.0113523
363	0.0102529
364	0.00924069
365	0.00839753
366	0.00779118
367	0.00747451
368	0.00748351
369	0.00783719
370	0.00853655
371	0.00956317
372	0.0108778
373	0.0124197
374	0.0141071
375	0.0158411
376	0.0175093
377	0.0189931
378	0.0201813
379	0.0209788
380	0.0213171
381	0.0211641
382	0.0205312
383	0.0194685
384	0.018063
385	0.0164271
386	0.0146836
387	0.0129537
388	0.0113431
389	0.00993257
390	0.00877206
391	0.00788036
392	0.00724841
393	0.00684556
394	0.0066267
395	0.00654114
396	0.00653838
397	0.00657325
398	0.00660822
399	0.00661526
400	0.00657638
401	0.00648212
402	0.00632853
403	0.00611748
404	0.00585504
405	0.00554923
406	0.00521123
407	0.00485429
408	0.00449527
409	0.00415417
410	0.00385513
411	0.0036235
412	0.00348374
413	0.00345799
414	0.00356309
415	0.00380837
416	0.00419702
417	0.00472479
418	0.00538345
419	0.00616322
420	0.00705442
421	0.00804902
422	0.00914132
423	0.0103236
424	0.0115813
425	0.0128911
426	0.0142146
427	0.0154973
428	0.0166702
429	0.0176538
430	0.0183671
431	0.0187379
432	0.0187133
433	0.0182672
434	0.0174075
435	0.0161776
436	0.0146527
437	0.0129346
438	0.0111383
439	0.00937991
440	0.00776564
441	0.00638183
442	0.00528669
443	0.00450976
444	0.00405074
445	0.0038831
446	0.00396051
447	0.00422317
448	0.00460688
449	0.0050489
450	0.00549593
451	0.00591049
452	0.00627188
453	0.0065789
454	0.00684628
455	0.00709768
456	0.00736063
457	0.00765887
458	0.00800883
459	0.0084155
460	0.0088718
461	0.00935907
462	0.00985126
463	0.0103151
464	0.0107169
465	0.0110222
466	0.0112007
467	0.0112297
468	0.0110962
469	0.0108032
470	0.0103668
471	0.00981683
472	0.00919693
473	0.00855746
474	0.00795125
475	0.00742859
476	0.00702932
477	0.00677821
478	0.00668246
479	0.00673002
480	0.00689337
481	0.00713356
482	0.00740778
483	0.00767671
484	0.00790955
485	0.00809199
486	0.00822449
487	0.00832117
488	0.00840704
489	0.00851044
490	0.00866136
491	0.00888308
492	0.00918805
493	0.00957609
494	0.0100322
495	0.0105284
496	0.0110252
497	0.0114755
498	0.0118286
499	0.0120379
500	0.0120631
501	0.0118774
502	0.0114689
503	0.0108443
504	0.0100264
505	0.0090533
506	0.00797436
507	0.00684549
508	0.00572261
509	0.00465729
510	0.00369208
511	0.00285907
512	0.00217916
513	0.00166174
514	0.00130729
515	0.00110868
516	0.0010542
517	0.0011286
518	0.00131423
519	0.00159152
520	0.00194008
521	0.00233751
522	0.0027621
523	0.00319266
524	0.00361148
525	0.00400459
526	0.00436347
527	0.00468589
528	0.00497509
529	0.00523735
530	0.00548065
531	0.0057121
532	0.00593506
533	0.00614997
534	0.00635076
535	0.00652692
536	0.006666
537	0.00675642
538	0.00679092
539	0.00676966
540	0.00670308
541	0.006613
542	0.00652702
543	0.00647675
544	0.00649289
545	0.00660083
546	0.00681749
547	0.00714848
548	0.00758759
549	0.00811812
550	0.00871196
551	0.00933192
552	0.00993577
553	0.0104761
554	0.0109098
555	0.0111995
556	0.0113183
557	0.0112563
558	0.0110228
559	0.0106469
560	0.0101765
561	0.00967286
562	0.00920855
563	0.00885377
564	0.00866792
565	0.00868979
566	0.00892999
567	0.00936695
568	0.00994795
569	0.0105942
570	0.0112121
571	0.0117054
572	0.0119878
573	0.011998
574	0.0117033
575	0.011106
576	0.010241
577	0.0091671
578	0.00795985
579	0.00669976
580	0.00546224
581	0.00431096
582	0.00329072
583	0.00242896
584	0.00173657
585	0.00121056
586	0.000839495
587	0.000608791
588	0.000504357
589	0.000515169
590	0.000635912
591	0.000865739
592	0.00120882
593	0.00166956
594	0.00225301
595	0.00296092
596	0.00379029
597	0.00473133
598	0.00576716
599	0.00687532
600	0.00802926
601	0.0091993
602	0.0103564
603	0.0114726
604	0.0125227
605	0.0134866
606	0.0143481
607	0.0150945
608	0.0157163
609	0.0162063
610	0.0165554
611	0.0167552
612	0.0167938
613	0.0166609
614	0.0163472
615	0.0158489
616	0.0151711
617	0.0143325
618	0.0133655
619	0.0123156
620	0.0112392
621	0.0102006
622	0.00926472
623	0.00849
624	0.00792124
625	0.00758276
626	0.00747543
627	0.0075751
628	0.00783445
629	0.00818961
630	0.00856772
631	0.00889499
632	0.00910881
633	0.00916131
634	0.00902815
635	0.00870798
636	0.0082225
637	0.00761087
638	0.006925
639	0.00622307
640	0.00556137
641	0.00498702
642	0.00453436
643	0.00422335
644	0.00405775
645	0.004028
646	0.00411468
647	0.00429289
648	0.00453649
649	0.00482058
650	0.00512534
651	0.00543453
652	0.0057347
653	0.0060155
654	0.00626578
655	0.0064738
656	0.00662743
657	0.00671419
658	0.00672394
659	0.00664946
660	0.00649008
661	0.00625459
662	0.00596003
663	0.00563077
664	0.00529832
665	0.00499585
666	0.00475316
667	0.00459421
668	0.00453417
669	0.00457894
670	0.00472541
671	0.00496477
672	0.00528463
673	0.00567064
674	0.00611038
675	0.00659067
676	0.00709715
677	0.00761478
678	0.00812289
679	0.00859818
680	0.00901392
681	0.00934314
682	0.00956441
683	0.00966649
684	0.00965155
685	0.00953797
686	0.00935948
687	0.00915755
688	0.00897506
689	0.00884895
690	0.0088031
691	0.00884458
692	0.00896459
693	0.00914245
694	0.00935192
695	0.0095699
696	0.00978018
697	0.00997731
698	0.0101695
699	0.0103724
700	0.0106063
701	0.0108923
702	0.0112455
703	0.0116736
704	0.0121747
705	0.0127384
706	0.0133463
707	0.0139736
708	0.0145905
709	0.0151623
710	0.0156544
711	0.0160332
712	0.0162693
713	0.0163421
714	0.0162408
715	0.0159701
716	0.0155484
717	0.0150058
718	0.0143815
719	0.0137196
720	0.0130625
721	0.0124446
722	0.0118912
723	0.0114106
724	0.0109948
725	0.0106207
726	0.010255
727	0.00986168
728	0.00940862
729	0.00887729
730	0.00826334
731	0.0075826
732	0.00686534
733	0.00615013
734	0.00547752
735	0.00488133
736	0.00438475
737	0.00399847
738	0.00371894
739	0.00353344
740	0.00342401
741	0.0033728
742	0.00336468
743	0.00339249
744	0.00345475
745	0.00355445
746	0.00369681
747	0.0038857
748	0.00412131
749	0.00439897
750	0.00471106
751	0.00504726
752	0.00539722
753	0.005754
754	0.00611326
755	0.00647481
756	0.0068406
757	0.00721294
758	0.00759402
759	0.00798185
760	0.00836941
761	0.00874403
762	0.00908739
763	0.00937987
764	0.00960035
765	0.00973101
766	0.00975943
767	0.00968197
768	0.00950485
769	0.00924258
770	0.00891705
771	0.00855426
772	0.00818406
773	0.00783319
774	0.00752477
775	0.00727404
776	0.0070883
777	0.00696416
778	0.00688791
779	0.00683863
780	0.00679113
781	0.0067205
782	0.00660672
783	0.00643655
784	0.00620878
785	0.00592986
786	0.00561283
787	0.00527345
788	0.00492737
789	0.0045885
790	0.00426838
791	0.00397594
792	0.00371933
793	0.0035078
794	0.00335124
795	0.00326049
796	0.00324572
797	0.00331687
798	0.00348083
799	0.00374139
800	0.00409867
801	0.00454891
802	0.00508476
803	0.00569341
804	0.00635687
805	0.00705124
806	0.00774678
807	0.00840815
808	0.00899881
809	0.00948489
810	0.00983946
811	0.0100498
812	0.0101171
813	0.0100624
814	0.00992035
815	0.00973586
816	0.00955898
817	0.00943765
818	0.00941463
819	0.00952011
820	0.00977014
821	0.0101652
822	0.0106895
823	0.0113148
824	0.0120012
825	0.0127012
826	0.0133631
827	0.0139376
828	0.014378
829	0.0146465
830	0.014717
831	0.0145752
832	0.0142221
833	0.0136704
834	0.0129486
835	0.0120945
836	0.0111515
837	0.010164
838	0.00917166
839	0.00820917
840	0.00730167
841	0.00646563
842	0.00571056
843	0.00504063
844	0.00445748
845	0.00396313
846	0.00355877
847	0.00324484
848	0.0030198
849	0.00287807
850	0.00280919
851	0.00279828
852	0.00282679
853	0.00287541
854	0.00292578
855	0.00296475
856	0.00298525
857	0.00298804
858	0.00297936
859	0.00296737
860	0.00296083
861	0.00296545
862	0.00298229
863	0.00300764
864	0.00303535
865	0.00305764
866	0.00306986
867	0.00307122
868	0.00306775
869	0.00306976
870	0.003091
871	0.00314531
872	0.00324328
873	0.00339136
874	0.0035906
875	0.00383728
876	0.00412587
877	0.00445077
878	0.00481036
879	0.00520776
880	0.00565118
881	0.00615206
882	0.00672326
883	0.00737554
884	0.00811313
885	0.0089331
886	0.00982078
887	0.0107501
888	0.0116846
889	0.0125825
890	0.0134001
891	0.0140975
892	0.0146438
893	0.0150182
894	0.0152129
895	0.015233
896	0.0150937
897	0.0148187
898	0.0144353
899	0.0139754
900	0.0134691
901	0.0129456
902	0.0124297
903	0.0119425
904	0.0115012
905	0.0111187
906	0.0108066
907	0.0105741
908	0.010426
909	0.0103612
910	0.0103695
911	0.0104318
912	0.0105176
913	0.0105895
914	0.0106064
915	0.0105292
916	0.0103278
917	0.00998539
918	0.00950395
919	0.00890008
920	0.0082065
921	0.00746595
922	0.00672721
923	0.00603839
924	0.00544442
925	0.00497987
926	0.00466636
927	0.00451043
928	0.00450389
929	0.00462411
930	0.00483734
931	0.0051036
932	0.00538459
933	0.00564828
934	0.0058742
935	0.00605945
936	0.00621499
937	0.0063657
938	0.00654338
939	0.00678255
940	0.00711288
941	0.00755402
942	0.00811222
943	0.00877908
944	0.00953078
945	0.0103331
946	0.0111425
947	0.01191
948	0.0125862
949	0.0131241
950	0.0134851
951	0.0136422
952	0.0135837
953	0.0133189
954	0.0128781
955	0.01231
956	0.0116818
957	0.0110679
958	0.0105399
959	0.0101554
960	0.00994707
961	0.00991848
962	0.0100391
963	0.0102517
964	0.0104828
965	0.0106558
966	0.0107069
967	0.0105997
968	0.010329
969	0.00992813
970	0.00945775
971	0.00899567
972	0.00862255
973	0.0084047
974	0.00838416
975	0.00857147
976	0.00894261
977	0.00944764
978	0.0100211
979	0.0105949
980	0.0111123
981	0.011535
982	0.0118561
983	0.0120909
984	0.0122723
985	0.0124439
986	0.0126446
987	0.0129009
988	0.0132236
989	0.0136032
990	0.0140182
991	0.014443
992	0.0148524
993	0.0152319
994	0.0155787
995	0.0159011
996	0.0162161
997	0.0165379
998	0.0168719
999	0.0172088
[truncated: 1 more rows]
