# Supplementary material for: Cellular and circuit features distinguish mouse dentate gyrus semilunar granule cells and granule cells activated during contextual memory formation
Source: eLife. 2025 Aug 27;13:RP101428. doi: 10.7554/eLife.101428 (PMC12387755; doi:10.7554/eLife.101428)
Supplement: Figure 6—source data 1. [file elife-101428-fig6-data1.xlsx]

## Sheet: Main_6_E_100_ms
L_L_x_line	-100	-90	-80	-70	-60	-50	-40	-30	-20	-10	0	10	20	30	40	50	60	70	80	90	100
L_L_y_line	0.0319213	0.0792499	0.0630456	0.0478942	0.0401728	0.0814084	0.0678665	0.0885918	0.0394691	0.0663581	0.117263	0.0239888	0.056178	0.0628872	0.0546978	0.0559457	0.0389661	0.0574867	0.0993911	0.0714101	0.0426526
L_L_x_shade_lower	-100	-90	-80	-70	-60	-50	-40	-30	-20	-10	0	10	20	30	40	50	60	70	80	90	100
L_L_y_shade_lower	0.0252712	0.0692694	0.0547941	0.0376506	0.0357852	0.0639113	0.0589833	0.0801393	0.0341969	0.0563992	0.102819	0.0188695	0.0499276	0.0534832	0.0470991	0.0491324	0.0304467	0.0471228	0.0869685	0.0618046	0.0341833
L_L_x_shade_upper	100	90	80	70	60	50	40	30	20	10	0	-10	-20	-30	-40	-50	-60	-70	-80	-90	-100
L_L_y_shade_upper	0.0511219	0.0810156	0.111814	0.0678505	0.0474855	0.0627591	0.0622965	0.0722913	0.0624283	0.029108	0.131707	0.076317	0.0447412	0.0970443	0.0767497	0.0989055	0.0445605	0.0581378	0.0712972	0.0892305	0.0385714
L_U_x_line	-100	-90	-80	-70	-60	-50	-40	-30	-20	-10	0	10	20	30	40	50	60	70	80	90	100
L_U_y_line	0.0432762	0.0566715	0.0547054	0.0629739	0.0226756	0.0774298	0.0547	0.0754524	0.0547794	0.0593701	0.0865978	0.0577486	0.0576292	0.0508746	0.0868125	0.0548125	0.0510108	0.0736985	0.0533224	0.0535219	0.028701
L_U_x_shade_lower	-100	-90	-80	-70	-60	-50	-40	-30	-20	-10	0	10	20	30	40	50	60	70	80	90	100
L_U_y_shade_lower	0.0387681	0.0480407	0.04806	0.05423	0.0182275	0.0702668	0.0479091	0.0642074	0.0458602	0.0539054	0.0779766	0.0505667	0.0528055	0.0431126	0.0733348	0.0461439	0.0444986	0.065877	0.0480583	0.0483143	0.0232616
L_U_x_shade_upper	100	90	80	70	60	50	40	30	20	10	0	-10	-20	-30	-40	-50	-60	-70	-80	-90	-100
L_U_y_shade_upper	0.0341404	0.0587294	0.0585865	0.0815199	0.057523	0.0634811	0.10029	0.0586367	0.0624528	0.0649305	0.0952191	0.0648348	0.0636985	0.0866974	0.0614908	0.0845927	0.0271237	0.0717178	0.0613508	0.0653023	0.0477842
Jitt_x_line	-100	-90	-80	-70	-60	-50	-40	-30	-20	-10	0	10	20	30	40	50	60	70	80	90	100
Jitt_y_line	0.0317632	0.0603769	0.0582702	0.0594946	0.0597542	0.0602493	0.0606498	0.0625517	0.0619461	0.060172	0.0605929	0.0628541	0.0608762	0.0599999	0.0621914	0.0623099	0.0619431	0.0610511	0.063756	0.0628417	0.0343231
Jitt_x_shade_lower	-100	-90	-80	-70	-60	-50	-40	-30	-20	-10	0	10	20	30	40	50	60	70	80	90	100
Jitt_y_shade_lower	0.0310109	0.0594449	0.0572643	0.0584705	0.0588075	0.0592477	0.0596139	0.0616421	0.0610108	0.0591554	0.0595608	0.0618003	0.059948	0.0590712	0.0611809	0.0613887	0.0610099	0.060076	0.0627367	0.0618348	0.0335285
Jitt_x_shade_upper	100	90	80	70	60	50	40	30	20	10	0	-10	-20	-30	-40	-50	-60	-70	-80	-90	-100
Jitt_y_shade_upper	0.0351178	0.0638486	0.0647754	0.0620262	0.0628764	0.0632312	0.063202	0.0609285	0.0618044	0.063908	0.061625	0.0611886	0.0628814	0.0634613	0.0616857	0.0612509	0.0607009	0.0605187	0.0592761	0.0613089	0.0325154

## Sheet: Main_8_E_100_ms_Inset
R_Max_L_L	R_Max_L_U
0.153191	0.113402
0.219363	0.105037
0.168972	0.230633
0.223249	0.114708
0.163028	0.0995629
0.13794	0.095413
0.218797	0.103091
	0.144291

## Sheet: Main_6_F_50_ms
L_L_x_line	-50	-45	-40	-35	-30	-25	-20	-15	-10	-5	0	5	10	15	20	25	30	35	40	45	50
L_L_y_line	0.0484803	0.0412156	0.0227861	0.0358219	0.062752	0.0396898	0.00641776	0.0133319	0.0449768	0.0384185	0.0805229	0.0202931	0.00726825	0.033527	0.0184442	0.0321612	0.0247057	0.0320928	0.0358706	0.0187432	0.0312619
L_L_x_shade_lower	-50	-45	-40	-35	-30	-25	-20	-15	-10	-5	0	5	10	15	20	25	30	35	40	45	50
L_L_y_shade_lower	0.0352759	0.0329213	0.0174823	0.0281615	0.0527891	0.0322111	0.00491287	0.0088719	0.0337305	0.0293118	0.0695015	0.0189718	0.00510588	0.0289778	0.0137776	0.0274369	0.0206053	0.0248877	0.0299026	0.0149857	0.0266138
L_L_x_shade_upper	50	45	40	35	30	25	20	15	10	5	0	-5	-10	-15	-20	-25	-30	-35	-40	-45	-50
L_L_y_shade_upper	0.0359099	0.0225007	0.0418387	0.0392978	0.0288061	0.0368855	0.0231108	0.0380762	0.00943063	0.0216145	0.0915443	0.0475252	0.0562231	0.017792	0.00792265	0.0471685	0.072715	0.0434824	0.0280899	0.04951	0.0616848
L_U_x_line	-50	-45	-40	-35	-30	-25	-20	-15	-10	-5	0	5	10	15	20	25	30	35	40	45	50
L_U_y_line	0.0416728	0.0295295	0.0242222	0.0296631	0.0458173	0.0338144	0.0195578	0.0373386	0.030262	0.0333605	0.0417425	0.0375706	0.0282086	0.0329352	0.0162579	0.0360681	0.024198	0.0291985	0.0557361	0.0216646	0.0292009
L_U_x_shade_lower	-50	-45	-40	-35	-30	-25	-20	-15	-10	-5	0	5	10	15	20	25	30	35	40	45	50
L_U_y_shade_lower	0.0334005	0.0217488	0.020374	0.0261024	0.0360024	0.0276353	0.016527	0.0309547	0.0255953	0.0292515	0.0361745	0.0261027	0.0229303	0.0273265	0.0129676	0.0312416	0.0191342	0.0244747	0.042651	0.0157131	0.0234773
L_U_x_shade_upper	50	45	40	35	30	25	20	15	10	5	0	-5	-10	-15	-20	-25	-30	-35	-40	-45	-50
L_U_y_shade_upper	0.0349244	0.0276161	0.0688211	0.0339223	0.0292618	0.0408946	0.0195482	0.0385438	0.033487	0.0490385	0.0473105	0.0374695	0.0349287	0.0437226	0.0225887	0.0399935	0.0556321	0.0332238	0.0280705	0.0373102	0.0499451
Jitt_x_line	-50	-45	-40	-35	-30	-25	-20	-15	-10	-5	0	5	10	15	20	25	30	35	40	45	50
Jitt_y_line	0.0301424	0.0306418	0.031009	0.0302337	0.0320315	0.0297044	0.0306615	0.0322678	0.0301091	0.0305275	0.0298985	0.0304798	0.031139	0.0314411	0.0302473	0.030354	0.0294213	0.0312486	0.0314732	0.0309231	0.0315545
Jitt_x_shade_lower	-50	-45	-40	-35	-30	-25	-20	-15	-10	-5	0	5	10	15	20	25	30	35	40	45	50
Jitt_y_shade_lower	0.0294588	0.0298742	0.0302873	0.0294958	0.031308	0.0290656	0.0299507	0.0315796	0.0294313	0.0297484	0.0291874	0.0297122	0.030457	0.0307616	0.0295538	0.0296293	0.0287764	0.0305796	0.0307301	0.0302431	0.0308275
Jitt_x_shade_upper	50	45	40	35	30	25	20	15	10	5	0	-5	-10	-15	-20	-25	-30	-35	-40	-45	-50
Jitt_y_shade_upper	0.0322815	0.0316031	0.0322162	0.0319177	0.0300663	0.0310787	0.0309409	0.0321207	0.0318209	0.0312474	0.0306095	0.0313065	0.0307868	0.0329561	0.0313723	0.0303432	0.032755	0.0309716	0.0317307	0.0314095	0.030826

## Sheet: Main_6_F_50_ms_Inset
R_Max_L_L	R_Max_L_U
0.120364	0.0680414
0.137102	0.0565584
0.138799	0.184506
0.169361	0.0955899
0.101892	0.0896066
0.13794	0.0807341
0.0654376	0.0782072
	0.0901816

## Sheet: Main_6_H_100_ms
Chance_x	0	0.002	0.004	0.006	0.008	0.01	0.012	0.014	0.016	0.018	0.02	0.022	0.024	0.026	0.028	0.03	0.032	0.034	0.036	0.038	0.04	0.042	0.044	0.046	0.048	0.05	0.052	0.054	0.056	0.058	0.06	0.062	0.064	0.066	0.068	0.07	0.072	0.074	0.076	0.078	0.08	0.082	0.084	0.086	0.088	0.09	0.092	0.094	0.096
Chance_y	0	0.002	0.004	0.006	0.008	0.01	0.012	0.014	0.016	0.018	0.02	0.022	0.024	0.026	0.028	0.03	0.032	0.034	0.036	0.038	0.04	0.042	0.044	0.046	0.048	0.05	0.052	0.054	0.056	0.058	0.06	0.062	0.064	0.066	0.068	0.07	0.072	0.074	0.076	0.078	0.08	0.082	0.084	0.086	0.088	0.09	0.092	0.094	0.096
False_Cum_Sum	0	0	0	0	0	0	0	0	0	0	0	0	0	0	0	0	0	0	0	0	0	0	0	0	0	0	0	0	0	0	0	0	0	0	0	0	0	0	0	0	0	0	0	0	0	0	0	0	0
Trues_Cum_Sum	0	0	0	0	0	0	0	0	0	0	0	0	0	0	0	0	0	0	0	0	0	0	0	0	0	0	0	0	0	0	0	0	0	0	0	0	0	0	0	0	0	0	0	0	0	0	0	0	0
[truncated: 452 more columns]

## Sheet: Main_6_H_50_ms
Chance_x	0	0.002	0.004	0.006	0.008	0.01	0.012	0.014	0.016	0.018	0.02	0.022	0.024	0.026	0.028	0.03	0.032	0.034	0.036	0.038	0.04	0.042	0.044	0.046	0.048	0.05	0.052	0.054	0.056	0.058	0.06	0.062	0.064	0.066	0.068	0.07	0.072	0.074	0.076	0.078	0.08	0.082	0.084	0.086	0.088	0.09	0.092	0.094	0.096
Chance_y	0	0.002	0.004	0.006	0.008	0.01	0.012	0.014	0.016	0.018	0.02	0.022	0.024	0.026	0.028	0.03	0.032	0.034	0.036	0.038	0.04	0.042	0.044	0.046	0.048	0.05	0.052	0.054	0.056	0.058	0.06	0.062	0.064	0.066	0.068	0.07	0.072	0.074	0.076	0.078	0.08	0.082	0.084	0.086	0.088	0.09	0.092	0.094	0.096
False_Cum_Sum	0	0	0	0	0	0	0	0	0	0	0	0	0	0	0	0	0	0	0	0	0	0	0	0	0	0	0	0	0	0	0	0	0	0	0	0	0	0	0	0	0	0	0	0	0	0	0	0	0
Trues_Cum_Sum	0	0	0	0	0	0	0	0	0	0	0	0	0	0	0	0	0	0	0	0	0	0	0	0	0	0	0	0	0	0	0	0	0	0	0	0	0	0	0	0	0	0	0	0	0	0	0	0	0
[truncated: 452 more columns]
